# Supplementary material
Source: Research Square preprint supplement (doi:10.21203/rs.3.rs-8610908/v1)
Supplement: Supplementary file 1 [file 25a17fa83d55fdd164c3f5e5.xlsx]

## Sheet: Odds ratios
		all hospital cases						Oncology						Radiation Oncology						ONT						oral maxillofacial surgery						gastroenterology						abdominal surgery						pneumology
Malignant tumour of	defining ICD-10-GM code	all hospital cases	hospital cases receving SPC	SPC rate	Odds ratio	upper 95-CI	lower 95-CI	all hospital cases	hospital cases receving SPC	SPC rate	Odds ratio	upper 95-CI	lower 95-CI	all hospital cases	hospital cases receving SPC	SPC rate	Odds ratio	upper 95-CI	lower 95-CI	all hospital cases	hospital cases receving SPC	SPC rate	Odds ratio	upper 95-CI	lower 95-CI	all hospital cases	hospital cases receving SPC	SPC rate	Odds ratio	upper 95-CI	lower 95-CI	all hospital cases	hospital cases receving SPC	SPC rate	Odds ratio	upper 95-CI	lower 95-CI	all hospital cases	hospital cases receving SPC	SPC rate	Odds ratio	upper 95-CI	lower 95-CI	all hospital cases	hospital cases receving SPC	SPC rate	Odds ratio	upper 95-CI	lower 95-CI
oral cavity / throat	C00 - 14	64973	2786	0.0428793	0.77806	0.748518	0.808769	6136	641	0.104465	2.02592	1.86613	2.19939	11165	346	0.0309897	0.555419	0.498903	0.618337	25869	587	0.0226913	0.403235	0.371421	0.437774	10308	174	0.0168801	0.298195	0.256646	0.34647
stomach	C16	55714	3800	0.0682055	1.27125	1.229	1.31496	11677	993	0.085039	1.61416	1.51187	1.72337	850	35	0.0411765	0.745834	0.5317	1.04621													9619	633	0.0658073	1.2234	1.12826	1.32656	15006	405	0.0269892	0.481731	0.436312	0.531877
intenstine/rectum	C18 - 20	181464	8824	0.0486267	0.887679	0.867755	0.908061	26385	1910	0.0723896	1.35532	1.29286	1.4208	4318	195	0.0451598	0.821397	0.711351	0.948467													21650	1111	0.0513164	0.939435	0.883976	0.998373	2702	45	0.0166543	0.294139	0.219053	0.394964
pancreas	C25	77490	7831	0.101058	1.95241	1.90504	2.00097	16725	1632	0.0975785	1.87792	1.78341	1.97743	584	22	0.0376712	0.679858	0.444008	1.04099													16365	1484	0.0906813	1.73194	1.64107	1.82785	13005	592	0.045521	0.828279	0.762458	0.899783
lung	C34	254444	19845	0.0779936	1.46912	1.44528	1.49335	44319	4900	0.110562	2.15885	2.09369	2.22603	11238	1188	0.105713	2.05297	1.93223	2.18125																									58693	3391	0.0577752	1.06492	1.02779	1.10341
malignant melanoma	C43	44705	1628	0.0364165	0.656358	0.624306	0.690056	2917	433	0.14844	3.02739	2.73285	3.35367	711	103	0.144866	2.94215	2.38729	3.62598
breast	C50	207681	9307	0.0448139	0.814811	0.796975	0.833046	14868	1761	0.118442	2.33339	2.21888	2.45382	3500	461	0.131714	2.63452	2.38797	2.90654
cervix	C53	18215	1118	0.061378	1.13567	1.06849	1.20708	1538	197	0.128088	2.55135	2.19653	2.96348	3744	37	0.00988248	0.173345	0.125382	0.239654
uterus (without cervix)	C54 - 55	27961	1401	0.0501055	0.916098	0.867713	0.967181	2151	221	0.102743	1.98869	1.72993	2.28615	1111	34	0.0306031	0.548271	0.389663	0.771437
ovary	C56	35523	3232	0.0909833	1.73829	1.67523	1.80372	4600	577	0.125435	2.49091	2.28203	2.7189	175	0	0	0
prostate	C61	158001	5658	0.0358099	0.645019	0.627458	0.663071	7644	998	0.13056	2.60797	2.43903	2.7886	3816	276	0.072327	1.35406	1.19767	1.53087
kidney	C64	37420	2069	0.0552913	1.01646	0.971754	1.06322	3274	452	0.138057	2.78172	2.51804	3.07301	690	107	0.155072	3.18748	2.59336	3.9177
bladder	C67	129135	2883	0.0223255	0.396587	0.381917	0.41182	4525	550	0.121547	2.40302	2.19731	2.62799	1228	91	0.0741042	1.38999	1.12259	1.7211
		all hospital cases	hospital cases receving SPC	SPC rate	Odds ratio	upper 95-CI	lower 95-CI	mortality
hospital cases	total	1292726	70382	0.0561867	1	0.989313	1.0108	0.0595834
oncology		146759	15265	0.104014	2.01615	1.97939	2.05359	0.0786187
radiation oncology		43130	2895	0.0671227	1.24962	1.20245	1.29863	0.0261999
pneumology		69001	3565	0.0516659	0.946182	0.914045	0.979448	0.0567818
urology		223301	2171.92	0.00972642	0.170581	0.163411	0.178065	0.0132198
gynecology		164759	1106	0.00671284	0.117372	0.110578	0.124582	0.00722267
ONT		25869	587	0.0226913	0.403235	0.371421	0.437774	0.0176659
dermatology		27655	445	0.0160911	0.284029	0.258553	0.312016	0.0080998
abdominal surgery		30713	1042	0.033927	0.609912	0.573108	0.64908	0.0639794
thoracic surgery		16000	223	0.0139375	0.245478	0.215038	0.280227	0.029375
gastroenterology		47634	3228	0.0677667	1.26248	1.21719	1.30945	0.0767729
oral maxillofacial surgery		10308	174	0.0168801	0.298195	0.256646	0.34647	0.0167831
[truncated: 24 more columns]
