# Supplementary material
Source: Research Square preprint supplement (doi:10.21203/rs.3.rs-8610908/v1)
Supplement: Supplementary file 2 [file 278c0372ebbba4eb8e14ec61.xlsx]

## Sheet: tabl_1_Age & Gender
all German hospital cases
tumour entities	oral cavity / throat		stomach		intenstine/rectum		pancreas		lung		malignant melanoma		breast		cervix		uterus (without cervix)		ovary		prostate		kidney		bladder
defining CD-10-GM code	C00 - 14		C16		C18 - 20		C25		C34		C43		C50		C53		C54 - C55		C56		C61		C64		C67
	hospital cases	%	hospital cases	%	hospital cases	%	hospital cases	%	hospital cases	%	hospital cases	%	hospital cases	%	hospital cases	%	hospital cases	%	hospital cases	%	hospital cases	%	hospital cases	%	hospital cases	%
all hospital cases	64973		55714		181464		77490		254444		44705		207681		18215		27961		35523		158001		37420		129135
gender
male	46347	0.713327	36187	0.649514	105608	0.581978	40298	0.520041	146114	0.574248	24759	0.553831	2087	0.0100491	1	5.48998e-05	4	0.000143056	8	0.000225206	157964	0.999766	25146	0.671994	99951	0.774004
female	18623	0.286627	19521	0.350379	75850	0.417989	37181	0.479817	108312	0.425681	19944	0.446125	205580	0.989884	18214	0.999945	27957	0.999857	35513	0.999718	32	0.00020253	12273	0.32798	29178	0.22595
diverse	1	1.5391e-05	0	0	1	5.51073e-06	0	0	0	0	1	2.23689e-05	1	4.81508e-06	0	0	0	0	0	0	0	0	0	0	3	2.32315e-05
unknown	2	3.0782e-05	6	0.000107693	5	2.75537e-05	11	0.000141954	18	7.07425e-05	1	2.23689e-05	13	6.2596e-05	0	0	0	0	2	5.63016e-05	5	3.16454e-05	1	2.67237e-05	3	2.32315e-05
age groups
16-17 years	295	0.00454035	209	0.0037513	783	0.00431491	109	0.00140663	155	0.000609171	511	0.0114305	826	0.00397725	188	0.0103212	49	0.00175244	669	0.0188329	14	8.8607e-05	129	0.00344735	105	0.000813103
18-29 years	726	0.0111739	1010	0.0181283	2738	0.0150884	423	0.00545877	1066	0.00418953	1720	0.0384744	8313	0.0400277	2300	0.12627	392	0.0140195	1118	0.0314726	27	0.000170885	436	0.0116515	588	0.00455337
30-39 years	2997	0.0461269	2919	0.0523926	8151	0.044918	2251	0.0290489	5487	0.0215647	3010	0.0673303	22868	0.110111	3562	0.195553	1287	0.0460284	2424	0.0682375	622	0.00393668	1485	0.0396847	2295	0.0177721
40-49 years	4594	0.0707063	3297	0.0591772	10244	0.056452	3544	0.0457349	10628	0.0417695	2782	0.0622302	19853	0.0955937	2075	0.113917	1750	0.0625872	2778	0.0782029	2700	0.0170885	1864	0.0498129	3692	0.0285902
50-54 years	9057	0.139396	5441	0.0976595	16968	0.0935061	7421	0.0957672	25669	0.100883	4454	0.0996309	23524	0.11327	2407	0.132144	3259	0.116555	4162	0.117164	8736	0.0552908	3519	0.0940406	8519	0.0659697
55-59 years	12569	0.19345	7466	0.134006	22942	0.126427	10449	0.134843	43090	0.16935	4984	0.111486	25799	0.124224	2377	0.130497	4318	0.154429	5093	0.143372	17527	0.11093	5139	0.137333	14246	0.110319
60-64 years	21335	0.328367	16788	0.301325	53800	0.296478	25991	0.335411	101012	0.396991	10641	0.238027	49260	0.237191	3349	0.183859	8579	0.30682	9825	0.276581	58657	0.371244	12449	0.332683	40405	0.31289
65-74 years	6002	0.0923768	6979	0.125265	23463	0.129298	11380	0.146858	33273	0.130767	5467	0.122291	20503	0.0987235	797	0.0437551	3161	0.11305	3833	0.107902	26241	0.166081	4952	0.132336	19787	0.153227
75-79 years	7398	0.113863	11605	0.208296	42375	0.233517	15922	0.205472	34064	0.133876	11136	0.2491	36735	0.176882	1160	0.0636838	5166	0.184757	5621	0.158236	43477	0.275169	7447	0.199011	39498	0.305866
fatal cases
tumour entities	oral cavity / throat		stomach		intenstine/rectum		pancreas		lung		malignant melanoma		breast		cervix		uterus (without cervix)		ovary		prostate		kidney		bladder
defining CD-10-GM code	C00 - 14		C16		C18 - 20		C25		C34		C43		C50		C53		C54 - C55		C56		C61		C64		C67
	hospital cases	%	hospital cases	%	hospital cases	%	hospital cases	%	hospital cases	%	hospital cases	%	hospital cases	%	hospital cases	%	hospital cases	%	hospital cases	%	hospital cases	%	hospital cases	%	hospital cases	%
all hospital cases	3045		4304		10595		8264		23715		1591		8134		727		1261		2243		6894		2139		4113
		0.0468656		0.0772517		0.0583862		0.106646		0.0932032		0.0355889		0.0391658		0.0399122		0.0450985		0.0631422		0.0436326		0.0571619		0.0318504
gender
male	2273	0.74647	2834	0.658	6259	0.59075	4451	0.538601	14464	0.609909	1015	0.637964	103	0.0126629	0	0	0	0	1	0.000445831	6888	0.99913	1476	0.690042	2987	0.726234
female	771	0.253202	1468	0.341	4333	0.408966	3807	0.460673	9245	0.389838	575	0.361408	8028	0.986968	727	1	1261	1	2240	0.998663	2	0.000290107	662	0.30949	1125	0.273523
diverse	0	0	0	0	0	0	0	0	0	0	0	0	0	0	0	0	0	0	0	0	0	0	0	0	0	0
unknown	1	0.000328407	2	0	3	0.000283152	6	0.000726041	6	0.000253004	1	0.000628536	3	0.000368822	0	0	0	0	2	0.000891663	4	0.000580215	1	0.000467508	1	0.000243132
age groups
16-17 years	4	0.00131363	15	0.003	16	0.00151015	3	0.00036302	8	0.000337339	5	0.00314268	11	0.00135235	2	0.00275103	0	0	15	0.00668747	0	0	1	0.000467508	0	0
18-29 years	10	0.00328407	60	0.014	79	0.00745635	20	0.00242014	64	0.00269871	37	0.0232558	171	0.0210229	49	0.0674003	11	0.00872324	21	0.00936246	0	0	11	0.00514259	16	0.0038901
30-39 years	67	0.0220033	158	0.037	258	0.0243511	141	0.017062	349	0.0147164	68	0.0427404	537	0.0660192	116	0.15956	39	0.0309278	80	0.0356665	11	0.00159559	40	0.0187003	39	0.00948213
40-49 years	155	0.0509031	190	0.044	358	0.0337895	270	0.0326718	707	0.0298124	81	0.0509114	472	0.058028	75	0.103164	41	0.0325139	110	0.0490415	38	0.00551204	69	0.0322581	82	0.0199368
50-54 years	311	0.102135	335	0.078	650	0.0613497	630	0.0762343	1822	0.076829	140	0.087995	706	0.0867962	84	0.115543	100	0.0793021	203	0.0905038	129	0.0187119	143	0.0668537	156	0.0379285
55-59 years	501	0.164532	501	0.116	952	0.0898537	887	0.107333	3386	0.142779	171	0.10748	854	0.104991	92	0.126547	146	0.115781	258	0.115025	328	0.0475776	219	0.102384	307	0.0746414
60-64 years	1077	0.353695	1221	0.284	2795	0.263804	2548	0.308325	9164	0.386422	354	0.222502	1969	0.24207	151	0.207703	401	0.318002	645	0.287561	1619	0.234842	633	0.295933	1059	0.257476
65-74 years	371	0.121839	555	0.129	1509	0.142426	1286	0.155615	3542	0.149357	221	0.138906	956	0.117531	56	0.0770289	175	0.138779	279	0.124387	1194	0.173194	297	0.13885	641	0.155847
75-79 years	549	0.180296	1269	0.295	3978	0.37546	2479	0.299976	4673	0.197048	514	0.323067	2458	0.302188	102	0.140303	348	0.275971	632	0.281765	3575	0.518567	726	0.339411	1813	0.440797

## Sheet: CCI
		oral cavity / throat				stomach				intestine / rectum				pancreas				lung				malignant melanoma				breast				cervix				uterus (without cervix)				ovar				prostate				kidney
		all hospital cases		specialized palliative care		all hospital cases		specialized palliative care		all hospital cases		specialized palliative care		all hospital cases		specialized palliative care		all hospital cases		specialized palliative care		all hospital cases		specialized palliative care		all hospital cases		specialized palliative care		all hospital cases		specialized palliative care		all hospital cases		specialized palliative care		all hospital cases		specialized palliative care		all hospital cases		specialized palliative care		all hospital cases		specialized palliative care
		all hospital cases	fatal cases	all hospital cases	fatal cases	all hospital cases	fatal cases	all hospital cases	fatal cases	all hospital cases	fatal cases	all hospital cases	fatal cases	all hospital cases	fatal cases	all hospital cases	fatal cases	all hospital cases	fatal cases	all hospital cases	fatal cases	all hospital cases	fatal cases	all hospital cases	fatal cases	all hospital cases	fatal cases	all hospital cases	fatal cases	all hospital cases	fatal cases	all hospital cases	fatal cases	all hospital cases	fatal cases	all hospital cases	fatal cases	all hospital cases	fatal cases	all hospital cases	fatal cases	all hospital cases	fatal cases	all hospital cases	fatal cases	all hospital cases	fatal cases	all hospital cases	fatal cases
total number of hospital cases		64973	3045	2786	900	55714	4304	3800	1655	181464	10595	8824	2968	77490	8264	7831	3006	254444	23715	19845	7065	44705	1591	1628	613	207681	8134	9307	2917	18215	727	1118	295	27961	1261	1401	472	35523	2243	3232	953	158001	545	5658	1855	37420	2139	2069	696
comorbidity	defining ICD-10-GM codes
acute myocardial infarction	I21, I22, I25.2	1732	85	58	15	1552	117	80	22	4987	446	161	41	1698	105	158	28	8760	1036	755	238	838	54	33	11	2485	152	127	31	152	0	0	0	368	36	21	0	388	24	30	0	6322	461	235	78	1308	86	61	58
congestive heart failure	I50	2924	374	172	71	5173	803	400	136	18480	2695	1088	427	5872	510	850	124	26919	4867	3064	1088	2185	316	178	71	14991	1854	1201	379	642	58	58	5	1910	242	141	48	2194	333	244	77	18151	2524	1152	394	4244	605	354	455
peripheral vascular disease	I70, I71, I73	2439	149	140	30	1523	139	91	5	4884	388	204	30	1660	88	154	0	14977	1553	1272	431	547	7	15	0	2201	136	90	7	151	0	0	0	210	5	5	0	290	0	24	0	4818	327	215	43	1104	70	56	58
cerebral vascular accidents (except hemiplegia)	I60 - I66, I67.0 - .2, I67.4 - 9, I68.1 - 2, I68.8, I69, G45.0 - 2, G45.8 - 9, G46	2167	166	113	33	1483	194	111	10	5156	564	295	97	2501	329	379	74	11622	1981	1287	459	1147	143	73	16	5234	432	202	74	242	0	17	0	593	40	9	0	545	39	44	8	6261	551	265	61	1315	109	63	80
pulmonary disease	J40 - J47, J60 - J67	6148	332	303	64	4029	301	205	58	12023	893	460	114	4656	127	457	44	76583	6791	6129	1851	1629	63	49	5	11894	495	516	106	608	21	34	5	1257	38	27	6	1444	89	110	26	10384	624	377	79	2885	145	104	104
peptic ulcer	K25 - K28	694	36	48	0	2116	196	99	26	2536	294	97	34	2075	102	183	3	2125	399	274	85	173	21	0	0	1116	133	89	72	57	0	0	0	85	5	5	0	231	35	20	0	1089	147	58	10	300	26	10	21
mild liver disease	K70.2 - 3, K73, K71.7, K74.0, K74.2 - 5	754	78	59	25	292	28	13	0	1062	139	66	32	399	37	36	5	996	165	96	31	43	5	0	0	481	48	27	18	19	0	0	0	28	0	0	0	67	5	0	0	371	47	18	5	108	7	0	0
severe liver disease	K72.9, K66.6, K66.7, K72.1	114	22	0	0	226	90	53	38	863	358	199	145	741	43	187	7	393	204	112	66	51	9	0	0	566	292	181	115	0	0	0	0	19	10	0	0	53	22	11	0	208	73	49	30	65	24	0	18
dementia	F00 - F03, F05.1	762	68	62	20	943	133	89	22	4499	614	298	89	1150	72	137	12	3391	616	461	143	721	39	33	6	3859	308	229	61	128	5	7	0	549	44	25	8	370	39	34	14	4730	574	340	133	670	70	57	51
paraplegia	G81, G04.1, G82.0 - 2	709	82	76	32	607	119	70	26	2840	387	288	102	1107	174	198	45	6694	1285	1331	407	880	156	204	77	2949	337	397	91	185	6	19	0	427	35	28	5	286	36	48	8	3353	426	426	97	945	101	136	69
diabetes	E10.9, E11.9, E13.9, E14.9, E10.1, E11.1, E13.1, E14.1, E10.5, E11.5, E13.5, E14.5	7558	337	342	107	8944	713	506	186	29153	1705	1264	403	24098	847	2380	287	40161	3845	3464	1018	5218	250	241	87	19959	977	1054	310	1367	81	86	28	4931	245	252	72	3194	238	320	97	24161	1196	945	279	7145	386	402	294
diabetes complications	E10.2, E11.2, E13.2, E14.2, E10.3, E11.3, E13.3, E14.3, E10.4, E11.4, E13.4, E14.4	474	36	12	0	858	81	65	13	3058	288	141	64	1588	69	185	14	3619	446	307	113	351	19	10	0	1807	117	115	30	104	0	6	0	401	26	11	0	295	33	20	7	2677	184	113	32	835	62	37	45
renal disease	N03, N05.2 - 6, N07.2 - 4, N01, N18, N19, N25	3970	323	258	93	5316	655	437	178	20856	2000	1278	462	6676	375	932	128	24613	3214	2599	907	2608	251	175	67	14484	1316	1188	400	1540	128	171	46	2393	215	213	72	3077	369	412	144	20373	1739	1085	373	8129	702	617	545
connective-tissue disorder	M32, M33.2, M34, M05.3, M05.8	289	6	0	0	309	25	6	0	1120	68	55	10	478	28	60	0	2576	185	174	49	311	0	0	0	1360	48	70	8	54	0	0	0	134	0	0	0	245	5	32	0	894	31	12	0	262	0	10	0
HIV	B20 - 24	51	0	0	0	0	0	0	0	32	0	0	0	34	0	0	0	152	13	12	0	0	0	0	0	0	0	0	0	27	0	0	0	0	0	0	0	0	0	0	0	23	0	0	0	0	0	0	0
haematological neoplasms	C80 - C86, C88.3, C88.7, C88.9, C90.0, C90.1, C91 - C94.3, C94.51, C94.7, C95 - 96	325	5	0	0	309	0	0	0	1056	69	22	0	231	5	13	0	1339	112	94	27	331	12	0	0	1194	63	44	46	0	0	0	0	79	0	0	0	127	6	6	0	1596	96	50	11	424	6	0	6
metastastic cancer	C77 - 79	28621	2143	2522	900	39672	4824	5257	2070	142729	12482	14553	4881	65369	2542	9817	1093	276803	32284	40368	13089	28938	3291	3888	1522	120785	13285	18526	6041	9803	881	1486	420	14041	1616	1992	693	31995	3088	4878	1516	68129	6841	8176	2620	24386	3100	3878	2184
Dementia	F00 - F03, F05.1	762	68	62	20	943	133	89	22	4499	614	298	89	1150	72	137	12	3391	616	461	143	721	39	33	6	3859	308	229	61	128	5	7	0	549	44	25	8	370	39	34	14	4730	574	340	133	670	70	57	51
Acute myocardial infarction	I21, I22, I25.2	1732	85	58	15	1552	117	80	22	4987	446	161	41	1698	105	158	28	8760	1036	755	238	838	54	33	11	2485	152	127	31	152	0	0	0	368	36	21	0	388	24	30	0	6322	461	235	78	1308	86	61	58
Congestive heart failure	I50	2924	374	172	71	5173	803	400	136	18480	2695	1088	427	5872	510	850	124	26919	4867	3064	1088	2185	316	178	71	14991	1854	1201	379	642	58	58	5	1910	242	141	48	2194	333	244	77	18151	2524	1152	394	4244	605	354	455
Peripheral vascular disease	I70, I71, I73	2439	149	140	30	1523	139	91	5	4884	388	204	30	1660	88	154	0	14977	1553	1272	431	547	7	15	0	2201	136	90	7	151	0	0	0	210	5	5	0	290	0	24	0	4818	327	215	43	1104	70	56	58
Cerebral vascular accidents (except hemiplegia)	I60 - I66, I67.0 - .2, I67.4 - .9, I68.1 - 2, I68.8, I69, G45.0 - .2, G45.8 - .9, G46	2167	166	113	33	1483	194	111	10	5156	564	295	97	2501	329	379	74	11622	1981	1287	459	1147	143	73	16	5234	432	202	74	242	0	17	0	593	40	9	0	545	39	44	8	6261	551	265	61	1315	109	63	80
Pulmonary disease	J40 - J47, J60 - J67	6148	332	303	64	4029	301	205	58	12023	893	460	114	4656	127	457	44	76583	6791	6129	1851	1629	63	49	5	11894	495	516	106	608	21	34	5	1257	38	27	6	1444	89	110	26	10384	624	377	79	2885	145	104	104
Connective-tissue disorder	M32, M33.2, M34, M05.3, M05.8	289	6	0	0	309	25	6	0	1120	68	55	10	478	28	60	0	2576	185	174	49	311	0	0	0	1360	48	70	8	54	0	0	0	134	0	0	0	245	5	32	0	894	31	12	0	262	0	10	0
Peptic ulcer	K25 - K28	694	36	48	0	2116	196	99	26	2536	294	97	34	2075	102	183	3	2125	399	274	85	173	21	0	0	1116	133	89	72	57	0	0	0	85	5	5	0	231	35	20	0	1089	147	58	10	300	26	10	21
Mild liver disease	K70.2 - .3, K73, K71.7, K74.0, K74.2 - 5	754	78	59	25	292	28	13	0	1062	139	66	32	399	37	36	5	996	165	96	31	43	5	0	0	481	48	27	18	19	0	0	0	28	0	0	0	67	5	0	0	371	47	18	5	108	7	0	0
Diabetes	E10.9, E11.9, E13.9, E14.9, E10.1, E11.1, E13.1, E14.1, E10.5, E11.5, E13.5, E14.5	7558	337	342	107	8944	713	506	186	29153	1705	1264	403	24098	847	2380	287	40161	3845	3464	1018	5218	250	241	87	19959	977	1054	310	1367	81	86	28	4931	245	252	72	3194	238	320	97	24161	1196	945	279	7145	386	402	294
Diabetes complications	E10.2, E11.2, E13.2, E14.2, E10.3, E11.3, E13.3, E14.3, E10.4, E11.4, E13.4, E14.4	474	36	12	0	858	81	65	13	3058	288	141	64	1588	69	185	14	3619	446	307	113	351	19	10	0	1807	117	115	30	104	0	6	0	401	26	11	0	295	33	20	7	2677	184	113	32	835	62	37	45
Paraplegia	G81, G04.1, G82.0 - 2	709	82	76	32	607	119	70	26	2840	387	288	102	1107	174	198	45	6694	1285	1331	407	880	156	204	77	2949	337	397	91	185	6	19	0	427	35	28	5	286	36	48	8	3353	426	426	97	945	101	136	69
Renal disease	N03, N05.2 - 6, N07.2 - 4, N01, N18, N19, N25	3970	323	258	93	5316	655	437	178	20856	2000	1278	462	6676	375	932	128	24613	3214	2599	907	2608	251	175	67	14484	1316	1188	400	1540	128	171	46	2393	215	213	72	3077	369	412	144	20373	1739	1085	373	8129	702	617	545
Haematological neoplasms	C80 - C86, C88.3, C88.7, C88.9, C90.0, C90.1, C91 - C94.3, C94.51, C94.7, C95 - 96	325	5	0	0	309	0	0	0	1056	69	22	0	231	5	13	0	1339	112	94	27	331	12	0	0	1194	63	44	46	0	0	0	0	79	0	0	0	127	6	6	0	1596	96	50	11	424	6	0	6
Severe liver disease	K72.9, K66.6, K66.7, K72.1	114	22	0	0	226	90	53	38	863	358	199	145	741	43	187	7	393	204	112	66	51	9	0	0	566	292	181	115	0	0	0	0	19	10	0	0	53	22	11	0	208	73	49	30	65	24	0	18
HIV	B20 - 24	51	0	0	0	0	0	0	0	32	0	0	0	34	0	0	0	152	13	12	0	0	0	0	0	0	0	0	0	27	0	0	0	0	0	0	0	0	0	0	0	23	0	0	0	0	0	0	0
		114	22	0	0	226	90	53	38	863	358	199	145	741	43	187	7	393	204	112	66	51	9	0	0	566	292	181	115	0	0	0	0	19	10	0	0	53	22	11	0	208	73	49	30	65	24	0	18
[truncated: 8 more columns]

## Sheet: SPC - overall
all hospital cases
location of solid tumors		location of solid tumors	oral cavity & throat		stomach		intestine / rectum		pancreas		lung		malignant melanoma		breast		cervix		uterus without cervix		ovary		prostate		kidney		urinary bladder		total
ICD-10 code		ICD-10 code	C00 - 14		C16		C18 - 20		C25		C34		C43		C50		C53		C54 - 55		C56		C61		C64		C67
total number of patients			64973		55714		181464		77490		254444		44705		207681		18215		27961		35523		158001		37420		129135		1292726
recevied no PC			62187	0.957121	51914	0.931795	172640	0.951373	69659	0.898942	234599	0.922006	43077	0.963583	198374	0.955186	17097	0.938622	26560	0.949894	32291	0.909017	152343	0.96419	35351	0.944709	126252	0.977675	1222344	0.945555
number cases receiving SPC			2786	0.0428793	3800	0.0682055	8824	0.0486267	7831	0.101058	19845	0.0779936	1628	0.0364165	9307	0.0448139	1118	0.061378	1401	0.0501055	3232	0.0909833	5658	0.0358099	2069	0.0552913	2883	0.0223255	70382	0.0544446
palliative care codes	total	OPS code	2896		3920		9060		8047		20509		1708		9582		1170		508		3348		5806		2145		2999		71698
	complex palliative care (e.g. on an external ward)	8-982	698	0.250538	1230	0.323684	2965	0.336015	2493	0.31835	6567	0.330915	421	0.2586	2959	0.317933	289	0.258497	124	0.0885082	938	0.290223	1768	0.312478	665	0.321411	800	0.277489	21917	0.311401
	specialized pallative care on a palliative care ward	8-98e	1269	0.455492	1841	0.484474	4381	0.496487	3981	0.508364	9602	0.48385	751	0.461302	4571	0.491136	516	0.461538	292	0.208423	1544	0.477723	2942	0.519972	1047	0.506042	1482	0.514048	34219	0.48619
	specialized pallative care by a consultation service	8-98h	929	0.320787	849	0.216582	1714	0.189183	1573	0.195477	4340	0.211614	536	0.313817	2052	0.214152	365	0.311966	92	0.181102	866	0.258662	1096	0.18877	433	0.201865	717	0.23908	15562	0.217049
fatal hospital cases
		all hospital cases
location of solid tumors		location of solid tumors	oral cavity & throat		stomach		intestine / rectum		pancreas		lung		malignant melanoma		breast		cervix		uterus without cervix		ovary		prostate		kidney		urinary bladder		total
ICD-10 code		ICD-10 code	C00 - 14		C16		C18 - 20		C25		C34		C43		C50		C53		C54 - 55		C56		C61		C64		C67
total number of patients			3045		4304		10595		8264		23715		1591		8134		727		1261		2243		6894		2139		4113		77025
recevied no PC			2145	0.704433	2649	0.615474	7627	0.719868	5258	0.636254	16650	0.702087	978	0.614708	5217	0.641382	432	0.594223	789	0.625694	1290	0.575123	5039	0.730925	1443	0.674614	2942	0.715293	52459	0.681065
number cases receiving SPC			900	0.295567	1655	0.384526	2968	0.280132	3006	0.363746	7065	0.297913	613	0.385292	2917	0.358618	295	0.405777	472	0.374306	953	0.424877	1855	0.269075	696	0.325386	1171	0.284707	24566	0.318935
palliative care codes	total	OPS code	1102				3093		3119		8079		649		3080		290		508		1008		1933		577		1235		24673
	complex palliative care (e.g. on an external ward)	8-982	536	0.595556	395	0.238671	856	0.28841	833	0.277112	2101	0.297381	156	0.254486	777	0.26637	69	0.233898	124	0.262712	241	0.252886	451	0.243127	80	0.114943	267	0.22801	6886	0.280306
	specialized pallative care on a palliative care ward	8-98e	333	0.37	883	0.533535	1856	0.625337	1853	0.616434	4782	0.676858	371	0.60522	1830	0.627357	189	0.640678	292	0.618644	603	0.632739	1221	0.658221	447	0.642241	757	0.646456	15417	0.627575
	specialized pallative care by a consultation service	8-98h	233	0.211434	210	#DIV/0!	381	0.123181	433	0.138827	1196	0.148038	122	0.187982	473	0.153571	32	0.110345	92	0.181102	164	0.162698	261	0.135023	50	0.0866551	211	0.17085	3858	0.156365
Fallzahl
no PC
8-982
8-98e
8-08h
all
			C00 - 14		C16		C18 - 20		C25		C34		C43		C50				C54 - 55		C56		C61		C64		C67
			64973		55714		181464		77490		254444		44705		207681				27961		35523		158001		37420		129135
			62077		51794		172404		69443		233938		42997		198099				26514		32175		152195		35275		126136
			698		1230		2965		2493		6567		421		2959				124		938		1768		665		800
			1269		1841		4381		3981		9602		751		4571				292		1544		2942		1047		1482
			929		849		1714		1573		4340		536		2052				92		866		1096		433		717
			2896		3920		9060		8047		20509		1708		9582				508		3348		5806		2145		2999

## Sheet: Odds ratios
		all hospital cases						Oncology						Radiation Oncology						ONT						oral maxillofacial surgery						gastroenterology						abdominal surgery						pneumology
Malignant tumour of	defining ICD-10-GM code	all hospital cases	hospital cases receving SPC	SPC rate	Odds ratio	upper 95-CI	lower 95-CI	all hospital cases	hospital cases receving SPC	SPC rate	Odds ratio	upper 95-CI	lower 95-CI	all hospital cases	hospital cases receving SPC	SPC rate	Odds ratio	upper 95-CI	lower 95-CI	all hospital cases	hospital cases receving SPC	SPC rate	Odds ratio	upper 95-CI	lower 95-CI	all hospital cases	hospital cases receving SPC	SPC rate	Odds ratio	upper 95-CI	lower 95-CI	all hospital cases	hospital cases receving SPC	SPC rate	Odds ratio	upper 95-CI	lower 95-CI	all hospital cases	hospital cases receving SPC	SPC rate	Odds ratio	upper 95-CI	lower 95-CI	all hospital cases	hospital cases receving SPC	SPC rate	Odds ratio	upper 95-CI	lower 95-CI
oral cavity / throat	C00 - 14	64973	2786	0.0428793	0.77806	0.748518	0.808769	6136	641	0.104465	2.02592	1.86613	2.19939	11165	346	0.0309897	0.555419	0.498903	0.618337	25869	587	0.0226913	0.403235	0.371421	0.437774	10308	174	0.0168801	0.298195	0.256646	0.34647
stomach	C16	55714	3800	0.0682055	1.27125	1.229	1.31496	11677	993	0.085039	1.61416	1.51187	1.72337	850	35	0.0411765	0.745834	0.5317	1.04621													9619	633	0.0658073	1.2234	1.12826	1.32656	15006	405	0.0269892	0.481731	0.436312	0.531877
intenstine/rectum	C18 - 20	181464	8824	0.0486267	0.887679	0.867755	0.908061	26385	1910	0.0723896	1.35532	1.29286	1.4208	4318	195	0.0451598	0.821397	0.711351	0.948467													21650	1111	0.0513164	0.939435	0.883976	0.998373	2702	45	0.0166543	0.294139	0.219053	0.394964
pancreas	C25	77490	7831	0.101058	1.95241	1.90504	2.00097	16725	1632	0.0975785	1.87792	1.78341	1.97743	584	22	0.0376712	0.679858	0.444008	1.04099													16365	1484	0.0906813	1.73194	1.64107	1.82785	13005	592	0.045521	0.828279	0.762458	0.899783
lung	C34	254444	19845	0.0779936	1.46912	1.44528	1.49335	44319	4900	0.110562	2.15885	2.09369	2.22603	11238	1188	0.105713	2.05297	1.93223	2.18125																									58693	3391	0.0577752	1.06492	1.02779	1.10341
malignant melanoma	C43	44705	1628	0.0364165	0.656358	0.624306	0.690056	2917	433	0.14844	3.02739	2.73285	3.35367	711	103	0.144866	2.94215	2.38729	3.62598
breast	C50	207681	9307	0.0448139	0.814811	0.796975	0.833046	14868	1761	0.118442	2.33339	2.21888	2.45382	3500	461	0.131714	2.63452	2.38797	2.90654
cervix	C53	18215	1118	0.061378	1.13567	1.06849	1.20708	1538	197	0.128088	2.55135	2.19653	2.96348	3744	37	0.00988248	0.173345	0.125382	0.239654
uterus (without cervix)	C54 - 55	27961	1401	0.0501055	0.916098	0.867713	0.967181	2151	221	0.102743	1.98869	1.72993	2.28615	1111	34	0.0306031	0.548271	0.389663	0.771437
ovary	C56	35523	3232	0.0909833	1.73829	1.67523	1.80372	4600	577	0.125435	2.49091	2.28203	2.7189	175	0	0	0
prostate	C61	158001	5658	0.0358099	0.645019	0.627458	0.663071	7644	998	0.13056	2.60797	2.43903	2.7886	3816	276	0.072327	1.35406	1.19767	1.53087
kidney	C64	37420	2069	0.0552913	1.01646	0.971754	1.06322	3274	452	0.138057	2.78172	2.51804	3.07301	690	107	0.155072	3.18748	2.59336	3.9177
bladder	C67	129135	2883	0.0223255	0.396587	0.381917	0.41182	4525	550	0.121547	2.40302	2.19731	2.62799	1228	91	0.0741042	1.38999	1.12259	1.7211
		all hospital cases	hospital cases receving SPC	SPC rate	Odds ratio	upper 95-CI	lower 95-CI	mortality
hospital cases	total	1292726	70382	0.0561867	1	0.989313	1.0108	0.0595834
oncology		146759	15265	0.104014	2.01615	1.97939	2.05359	0.0786187
radiation oncology		43130	2895	0.0671227	1.24962	1.20245	1.29863	0.0261999
pneumology		69001	3565	0.0516659	0.946182	0.914045	0.979448	0.0567818
urology		223301	2171.92	0.00972642	0.170581	0.163411	0.178065	0.0132198
gynecology		164759	1106	0.00671284	0.117372	0.110578	0.124582	0.00722267
ONT		25869	587	0.0226913	0.403235	0.371421	0.437774	0.0176659
dermatology		27655	445	0.0160911	0.284029	0.258553	0.312016	0.0080998
abdominal surgery		30713	1042	0.033927	0.609912	0.573108	0.64908	0.0639794
thoracic surgery		16000	223	0.0139375	0.245478	0.215038	0.280227	0.029375
gastroenterology		47634	3228	0.0677667	1.26248	1.21719	1.30945	0.0767729
oral maxillofacial surgery		10308	174	0.0168801	0.298195	0.256646	0.34647	0.0167831
[truncated: 24 more columns]

## Sheet: SPC - Mets
			oral cavity / throat			stomach			intestine / rectum			pancreas			lung			malignant melanoma			breast			cervix			uterus (without cervix)			ovary			prostate			kidney			bladder
			C00 - 14			C16			C18 - 20			C25			C34			C43			C50			C53			C54 - 55			C56			C61			C64			C67
			all hospital cases	specialized palliative care	%	all hospital cases	specialized palliative care	%	all hospital cases	specialized palliative care	%	all hospital cases	specialized palliative care	%	all hospital cases	specialized palliative care	%	all hospital cases	specialized palliative care	%	all hospital cases	specialized palliative care	%	all hospital cases	specialized palliative care	%	all hospital cases	specialized palliative care	%	all hospital cases	specialized palliative care	%	all hospital cases	specialized palliative care	%	all hospital cases	specialized palliative care	%	all hospital cases	specialized palliative care	%
		total number of hospital cases	64973	2786	0.0428793	55714	3800	0.0682055	181464	8824	0.0486267	77490	7831	0.101058	254444	19845	0.0779936	44705	1628	0.0364165	207681	9307	0.0448139	18215	1118	0.061378	27961	1401	0.0501055	35523	3232	0.0909833	158001	5658	0.0358099	37420	2069	0.0552913	129135	2883	0.0223255
ICD-10 -GM code	Secondary malignant neoplasm of	ICD-10 -GM code	case number	case number	%	case number	case number	%	case number	case number	%	case number	case number	%	case number	case number	%	case number	case number	%	case number	case number	%	case number	case number	%	case number	case number	%	case number	case number	%	case number	case number	%	case number	case number	%	case number	case number	%
C77.0	Lymph nodes of the head, face, and neck	C77.0	15649	599	0.0382772	285	35	0.122807	313	37	0.118211	166	17	0.10241	4225	475	0.112426	1053	49	0.0465337	964	112	0.116183	100	10	0.1	87	17	0.195402	129	24	0.186047	625	45	0.072	138	25	0.181159	156	25	0.160256
C77.1	Intrathoracic lymph nodes	C77.1	1027	106	0.103213	1526	127	0.0832241	2043	218	0.106706	775	96	0.123871	64653	5710	0.0883176	630	74	0.11746	2810	428	0.152313	225	41	0.182222	241	34	0.141079	376	53	0.140957	1712	151	0.0882009	1073	152	0.141659	694	82	0.118156
C77.2	Intraabdominal lymph nodes	C77.2	193	25	0.129534	7799	554	0.0710347	23698	1171	0.0494135	10706	859	0.0802354	3815	612	0.160419	523	69	0.131931	1101	175	0.158946	1007	103	0.102284	1144	111	0.097028	2095	251	0.119809	4154	408	0.0982186	1585	194	0.122397	2444	249	0.101882
C77.3	Axillary lymph nodes and upper extremity lymph nodes	C77.3	129	23	0.178295	89	16	0.179775	190	24	0.126316	61	6	0.0983607	1382	178	0.128799	2590	103	0.0397683	26552	981	0.0369464	42	0	0	79	6	0.0759494	213	33	0.15493	179	16	0.0893855	74	0	0	64	12	0.1875
C77.4	Inguinal lymph nodes and lower extremity lymph nodes	C77.4	27	0	0	25	0	0	684	59	0.0862573	43	0	0	273	49	0.179487	2083	93	0.0446471	147	19	0.129252	268	28	0.104478	180	20	0.111111	264	19	0.0719697	888	97	0.109234	38	0	0	524	49	0.0935115
C77.5	Intrapelvic lymph nodes	C77.5	25	0	0	93	0	0	3852	150	0.0389408	91	16	0.175824	237	35	0.147679	310	21	0.0677419	127	20	0.15748	1983	74	0.0373172	1330	57	0.0428571	844	72	0.0853081	6209	301	0.048478	172	17	0.0988372	3545	175	0.0493653
C77.8	Lymph nodes of multiple regions	C77.8	529	108	0.204159	997	148	0.148445	1941	300	0.15456	866	114	0.13164	6681	944	0.141296	700	151	0.215714	1493	368	0.246484	503	67	0.133201	398	66	0.165829	556	118	0.21223	3360	309	0.0919643	484	108	0.22314	1184	163	0.137669
C77.9	Lymph nodes, unspecified	C77.9	232	28	0.12069	362	47	0.129834	1008	127	0.125992	674	96	0.142433	1675	305	0.18209	324	38	0.117284	1025	152	0.148293	141	29	0.205674	134	26	0.19403	233	39	0.167382	1519	167	0.109941	266	56	0.210526	648	64	0.0987654
C78.0	lung	C78.0	3958	510	0.128853	2456	379	0.154316	22970	2577	0.11219	7633	1303	0.170706	24668	3428	0.138965	3895	598	0.15353	11356	2125	0.187126	1130	232	0.20531	2429	336	0.138329	1456	299	0.205357	4628	700	0.151253	6174	866	0.140266	3890	498	0.128021
C78.1	mediastinum	C78.1	66	9	0.136364	52	0	0	119	21	0.176471	36	0	0	924	123	0.133117	80	17	0.2125	266	51	0.191729	26	6	0.230769	27	0	0	55	0	0	58	0	0	83	7	0.0843373	39	5	0.128205
C78.2	pleura	C78.2	588	105	0.178571	1204	247	0.20515	1587	260	0.163831	1253	265	0.211492	21597	3092	0.143168	448	93	0.207589	8278	1408	0.170089	206	55	0.26699	466	104	0.223176	3020	523	0.173179	846	152	0.179669	897	167	0.186176	417	83	0.199041
C78.3	other and unspecified Respiratory Organs	C78.3	21	0	0	19	0	0	49	0	0	14	0	0	110	18	0.163636	40	0	0	28	7	0.25	11	0	0	10	0	0	61	0	0	15	0	0	35	0	0	0	0
C78.4	Small Intestine	C78.4	5	0	0	84	8	0.0952381	582	46	0.0790378	154	26	0.168831	307	49	0.159609	260	32	0.123077	146	28	0.191781	31	0	0	95	7	0.0736842	346	34	0.0982659	31	0	0	73	11	0.150685	86	0	0
C78.5	Colon and Rectum	C78.5	12	0	0	265	29	0.109434	496	50	0.100806	207	24	0.115942	310	39	0.125806	116	19	0.163793	277	30	0.108303	108	16	0.148148	216	22	0.101852	816	71	0.0870098	123	5	0.0406504	52	0	0	139	18	0.129496
C78.6	Retroperitoneum and Peritoneum	C78.6	138	22	0.15942	9760	1453	0.148873	17995	2422	0.134593	9988	2054	0.205647	3160	782	0.247468	642	152	0.23676	4215	950	0.225386	1110	227	0.204505	2565	429	0.167251	14522	2052	0.141303	1097	181	0.164995	831	148	0.178099	1697	334	0.196818
C78.7	Liver and Intrahepatic Bile Ducts	C78.7	1398	209	0.149499	8115	1026	0.126433	47058	4295	0.0912703	26527	3762	0.141818	28762	4673	0.162471	2635	462	0.175332	15733	3031	0.192652	922	204	0.221258	1285	238	0.185214	3231	666	0.206128	5188	941	0.18138	2326	449	0.193035	3245	486	0.149769
C78.8	Secondary Malignant Neoplasm of Other Unspecified Digestive Organs	C78.8	182	22	0.120879	446	73	0.163677	906	113	0.124724	611	95	0.155483	2441	446	0.182712	621	131	0.21095	837	164	0.195938	70	16	0.228571	81	14	0.17284	542	71	0.130996	155	27	0.174194	636	74	0.116352	108	21	0.194444
C79.0	Kidney and Renal Pelvis	C79.0	82	19	0.231707	39	11	0.282051	248	37	0.149194	140	35	0.25	2090	390	0.186603	154	26	0.168831	192	43	0.223958	42	21	0.5	32	5	0.15625	42	5	0.119048	87	19	0.218391	140	13	0.0928571	105	19	0.180952
C79.1	Bladder and Other Unspecified Urinary Organs	C79.1	0	0		52	0	0	356	33	0.0926966	21	0	0	78	26	0.333333	47	12	0.255319	124	21	0.169355	117	17	0.145299	85	12	0.141176	107	21	0.196262	287	30	0.10453	31	0	0	116	14	0.12069
C79.2	Skin	C79.2	314	67	0.213376	278	59	0.21223	1141	147	0.128834	245	57	0.232653	1495	309	0.206689	2877	174	0.0604797	2320	512	0.22069	88	23	0.261364	199	26	0.130653	390	73	0.187179	141	26	0.184397	226	44	0.19469	201	34	0.169154
C79.3	Brain and Meninges	C79.3	579	111	0.19171	868	202	0.232719	2883	524	0.181755	406	92	0.226601	40662	6744	0.165855	4527	771	0.170311	8163	1786	0.218792	238	63	0.264706	465	95	0.204301	496	110	0.221774	1364	302	0.221408	1602	262	0.163546	670	129	0.192537
C79.4	Secondary Malignant Neoplasm of Other Unspecified Parts of the Nervous System	C79.4	31	5	0.16129	54	21	0.388889	110	26	0.236364	48	0	0	920	216	0.234783	138	27	0.195652	357	75	0.210084	0	0		20	0	0	16	0	0	353	61	0.172805	99	19	0.191919	43	6	0.139535
C79.5	Bone and Bone Marrow	C79.5	1955	376	0.192327	2814	546	0.19403	6628	1255	0.189348	3019	636	0.210666	41098	7545	0.183586	2119	436	0.205757	28956	5357	0.185005	804	180	0.223881	1185	239	0.201688	646	170	0.263158	33032	4004	0.121216	5313	978	0.184077	4858	815	0.167765
C79.6	Ovary	C79.6	0	0		403	64	0.158809	844	70	0.0829384	90	22	0.244444	66	5	0.0757576	5	0	0	258	29	0.112403	69	0	0	163	5	0.0306748	74	0	0	0	0		18	0	0	11	0	0
C79.7	Adrenal gland	C79.7	142	32	0.225352	615	105	0.170732	1375	214	0.155636	603	108	0.179104	16927	2701	0.159568	575	130	0.226087	733	184	0.251023	49	7	0.142857	99	20	0.20202	117	38	0.324786	468	74	0.15812	925	153	0.165405	337	59	0.175074
C79.81	breast	C79.81	0	0		28	0	0	15	0	0	20	0	0	183	36	0.196721	40	0	0	369	22	0.0596206	0	0		6	0	0	37	0	0	0	0		25	0	0	9	0	0
C79.82	genital organs	C79.82	5	0	0	45	5	0.111111	383	43	0.112272	14	0	0	62	10	0.16129	27	0	0	149	22	0.147651	126	7	0.0555556	305	24	0.0786885	181	16	0.0883978	365	18	0.0493151	34	0	0	150	22	0.146667
C79.83	pericardium	C79.83	19	0	0	38	11	0.289474	29	0	0	12	0	0	1056	183	0.173295	20	5	0.25	187	33	0.176471	0	0		0	0		21	8	0.380952	11	0	0	23	6	0.26087	5	0	0
C79.84	Other heart	C79.84	16	5	0.3125	0	0		13	0	0	13	0	0	105	32	0.304762	26	0	0	16	0	0	0	0		16	0	0	0	0		0	0		19	0	0	0	0
C79.85	connective tissue and other soft tissues of the neck	C79.85	304	25	0.0822368	8	0	0	11	0	0	0	0		130	25	0.192308	41	5	0.121951	78	0	0	0	0		0	0		0	0		32	5	0.15625	19	0	0	0	0
C79.86	connective tissue and other soft tissues of the extremities	C79.86	15	11	0.733333	22	0	0	65	16	0.246154	8	0	0	381	74	0.194226	189	21	0.111111	67	12	0.179104	0	0		20	5	0.25	18	0	0	45	0	0	75	8	0.106667	36	13	0.361111
C79.88	Secondary malignant neoplasm of other specified sites	C79.88	932	105	0.112661	776	83	0.106959	2933	297	0.101262	814	112	0.137592	5962	1062	0.178128	1032	163	0.157946	3207	353	0.110072	387	60	0.155039	645	67	0.103876	1029	105	0.102041	955	117	0.122513	807	115	0.142503	987	118	0.119554
C79.9	Secondary malignant neoplasm of unspecified site	C79.9	48	0	0	55	8	0.145455	204	21	0.102941	111	22	0.198198	368	52	0.141304	171	16	0.0935673	254	28	0.110236	0	0		34	7	0.205882	62	7	0.112903	202	20	0.0990099	93	6	0.0645161	71	7	0.0985915
frequency of specialized in-patient palliative care
	≤12,5%
	12,5 %- 15,9%
	16% - 19,5%
	≥20%

## Sheet: mortality
		all hospital cases			specialized palliative care
Malignant tumour of	defining ICD-10-GM code	all hospital cases	fatal cases	in-hospital mortality	all hospital cases	fatal cases	in-hospital mortality
oral cavity / throat	C00 - 14	64973	3045	0.0468656	2786	900	0.323044
stomach	C16	55714	4304	0.0772517	3800	1655	0.435526
intenstine/rectum	C18 - 20	181464	10595	0.0583862	8824	2968	0.336355
pancreas	C25	77490	8264	0.106646	7831	3006	0.383859
lung	C34	254444	23715	0.0932032	19845	7065	0.356009
malignant melanoma	C43	44705	1591	0.0355889	1628	613	0.376536
breast	C50	207681	8134	0.0391658	9307	2917	0.31342
cervix	C53	18215	727	0.0399122	1118	295	0.263864
uterus (without cervix)	C54 - 55	27961	1261	0.0450985	1401	472	0.336902
ovary	C56	35523	2243	0.0631422	3232	953	0.294864
prostate	C61	158001	6894	0.0436326	5658	1855	0.327854
kidney	C64	37420	2139	0.0571619	2069	696	0.336394
bladder	C67	129135	4113	0.0318504	2883	1171	0.406174
location of secondary malignancies		lung			pleura			(retro-) peritoneal			liver			brain / lepto-meningeal			bone / bone marrow			adrenal gland
defining ICD-10-GM code		C78.0			C78.2			C78.6			C78.7			C79.3			C79.5			C79.7
		all hospital cases	fatal cases	in-hospital mortality	all hospital cases	fatal cases	in-hospital mortality	all hospital cases	fatal cases	in-hospital mortality	all hospital cases	fatal cases	in-hospital mortality	all hospital cases	fatal cases	in-hospital mortality	all hospital cases	fatal cases	in-hospital mortality	all hospital cases	fatal cases	in-hospital mortality
Malignant tumour of	defining ICD-10-GM code
oral cavity / throat	C00 - 14	3958	462	0.116726	588	104	0.176871	138	30	0.217391	1398	238	0.170243	579	98	0.169257	1955	317	0.162148	142	24	0.169014
stomach	C16	2456	367	0.14943	1204	285	0.236711	9760	1271	0.130225	8115	1025	0.126309	868	161	0.185484	2814	441	0.156716	615	85	0.138211
intenstine/rectum	C18 - 20	22970	2076	0.0903788	1587	263	0.165721	17995	2005	0.11142	47058	4134	0.087849	2883	353	0.122442	6628	825	0.124472	1375	158	0.114909
pancreas	C25	7633	312	0.0408751	1253	78	0.0622506	9988	503	0.0503604	26527	1042	0.0392807	406	41	0.100985	3019	160	0.0529977	603	22	0.0364842
lung	C34	24668	2753	0.111602	21597	2981	0.138028	3160	680	0.21519	28762	4520	0.157152	40662	4994	0.122817	41098	5730	0.139423	16927	2032	0.120045
malignant melanoma	C43	3895	529	0.135815	448	103	0.229911	642	147	0.228972	2635	466	0.17685	4527	640	0.141374	2119	362	0.170835	575	97	0.168696
breast	C50	11356	1626	0.143184	8278	1130	0.136506	4215	738	0.175089	15733	2678	0.170215	8163	1169	0.143207	28956	3510	0.121218	733	94	0.12824
cervix	C53	1130	141	0.124779	206	39	0.18932	1110	158	0.142342	922	146	0.158351	238	46	0.193277	804	100	0.124378	49	0	0
uterus (without cervix)	C54 - 55	2429	299	0.123096	466	87	0.186695	2565	385	0.150097	1285	227	0.176654	465	74	0.15914	1185	165	0.139241	99	11	0.111111
ovary	C56	1456	226	0.15522	3020	346	0.11457	14522	1304	0.0897948	3231	457	0.141442	496	58	0.116935	646	112	0.173375	117	19	0.162393
prostate	C61	4628	593	0.128133	846	160	0.189125	1097	190	0.1732	5188	973	0.187548	1364	244	0.178886	33032	3322	0.100569	468	58	0.123932
kidney	C64	6174	768	0.124393	897	165	0.183946	831	157	0.188929	2326	386	0.16595	1602	221	0.137953	5313	654	0.123094	925	94	0.101622
bladder	C67	3890	560	0.143959	417	101	0.242206	1697	378	0.222746	3245	641	0.197535	670	136	0.202985	4858	725	0.149238	337	63	0.186944

## Sheet: suppl.tab_1_code-definition
ICD-10-GM code	Description
Malignoma of the
C00 - 14	oral cavity
C16	stomach
C18 - 20	intestine / rectum
C25	pancreas
C34	lung
C43	malignant melanoma
C50	breast
C53	cervix uteri
C54 - 55	corpus uteri
C56	ovary
C61	prostate
C64	kidney cancer
C67	bladder cancer
Secondary malignant neoplasm of
C77.0	Lymph nodes of the head, face, and neck
C77.1	Intrathoracic lymph nodes
C77.2	Intraabdominal lymph nodes
C77.3	Axillary lymph nodes and upper extremity lymph nodes
C77.4	Inguinal lymph nodes and lower extremity lymph nodes
C77.5	Intrapelvic lymph nodes
C77.8	Lymph nodes of multiple regions
C77.9	Lymph nodes, unspecified
C78.0	lung
C78.1	mediastinum
C78.2	pleura
C78.3	other and unspecified Respiratory Organs
C78.4	Small Intestine
C78.5	Colon and Rectum
C78.6	Retroperitoneum and Peritoneum
C78.7	Liver and Intrahepatic Bile Ducts
C78.8	Secondary Malignant Neoplasm of Other Unspecified Digestive Organs
C79.0	Kidney and Renal Pelvis
C79.1	Bladder and Other Unspecified Urinary Organs
C79.2	Skin
C79.3	Brain and Meninges
C79.4	Secondary Malignant Neoplasm of Other Unspecified Parts of the Nervous System
C79.5	Bone and Bone Marrow
C79.6	Ovary
C79.7	Adrenal gland
C79.81	breast
C79.82	genital organs
C79.83	pericardium
C79.84	Other heart
C79.85	connective tissue and other soft tissues of the neck
C79.86	connective tissue and other soft tissues of the extremities
C79.88	Secondary malignant neoplasm of other specified sites
C79.9	Secondary malignant neoplasm of unspecified site
Acute myocardial infarction
I21.0	Acute transmural myocardial infarction of the anterior wall
I21.1	Acute transmural myocardial infarction of the posterior wall
I21.2	Acute transmural myocardial infarction at other locations
I21.3	Acute transmural myocardial infarction at unspecified location
I21.4	Acute subendocardial myocardial infarction
I21.9	Acute myocardial infarction, unspecified
I25.20	Myocardial infarction occurred between 29 days and less than 4 months ago
I25.21	Myocardial infarction occurred between 4 months and less than 1 year ago
I25.22	Myocardial infarction occurred one year or more ago
I25.29	Myocardial infarction occurred unspecified
Congestive heart failure
I50.00	Primary right heart failure
I50.01	Secondary right heart failure
I50.02	Right heart failure without symptoms
I50.03	Right heart failure with symptoms during strenuous exercise
I50.04	Right heart failure with symptoms during mild exercise
I50.05	Right heart failure with symptoms at rest
I50.11	Left heart failure: without symptoms
I50.12	Left heart failure: with symptoms during strenuous exercise
I50.13	Left heart failure: with symptoms during mild exercise
I50.14	Left heart failure: with symptoms at rest
I50.19	Left heart failure: unspecified
I50.9	Heart failure, unspecified
Peripheral vascular disease
I70.20	Atherosclerosis of the extremity arteries: pelvic-leg type, without symptoms
I70.21	Atherosclerosis of the extremity arteries: pelvic-leg type, with exercise-induced ischemic pain, walking distance of 200 m or more
I70.22	Atherosclerosis of the extremity arteries: pelvic-leg type, with exercise-induced ischemic pain, walking distance less than 200 m
I70.23	Atherosclerosis of the extremity arteries: pelvic-leg type, with resting pain
I70.24	Atherosclerosis of the extremity arteries: pelvic-leg type, with ulceration
I70.25	Atherosclerosis of the extremity arteries: pelvic-leg type, with gangrene
I70.26	Atherosclerosis of the extremity arteries: shoulder-arm type, all stages
I70.29	Atherosclerosis of the extremity arteries: other and unspecified
I71.00	Dissektion der Aorta nicht näher bezeichneter Lokalisation, ohne Angabe einer Ruptur
I71.01	Dissektion der Aorta thoracica, ohne Angabe einer Ruptur
I71.02	Dissektion der Aorta abdominalis, ohne Angabe einer Ruptur
I71.03	Dissektion der Aorta, thorakoabdominal, ohne Angabe einer Ruptur
I71.2	Aneurysma der Aorta thoracica, ohne Angabe einer Ruptur
I71.3	Aneurysma der Aorta abdominalis, rupturiert
I71.3	Aneurysma der Aorta abdominalis, rupturiert
I71.4	Aneurysma der Aorta abdominalis, ohne Angabe einer Ruptur
I71.6	Aortenaneurysma, thorakoabdominal, ohne Angabe einer Ruptur
I71.9	Aortenaneurysma nicht näher bezeichneter Lokalisation, ohne Angabe einer Ruptur
I73.0	Raynaud's syndrome
I73.8	Other specified peripheral vascular diseases
I73.9	Peripheral vascular disease, not specified further specified
Cerebral vascular accidents (except hemiplegia)
I60.1	Subarachnoid hemorrhage originating from the middle cerebral artery
I60.2	Subarachnoid hemorrhage originating from the anterior communicating artery
I60.6	Subarachnoid hemorrhage originating from other intracranial arteries
I60.7	Subarachnoid hemorrhage originating from an unspecified intracranial artery
I60.8	Other subarachnoid hemorrhage
I60.9	Subarachnoid hemorrhage, unspecified
I61.0	Intracerebral hemorrhage into the cerebral hemisphere, subcortical
I61.1	Intracerebral hemorrhage into the cerebral hemisphere, cortical
I61.2	Intracerebral hemorrhage into the cerebral hemisphere, unspecified
I61.3	Intracerebral hemorrhage into the brainstem
I61.4	Intracerebral hemorrhage into the cerebellum
I61.5	Intracerebral intraventricular hemorrhage
I61.6	Intracerebral hemorrhage at multiple sites
I61.8	Other intracerebral hemorrhage
I61.9	Intracerebral hemorrhage, Unspecified
I62.00	Nontraumatic subdural hemorrhage: Acute
I62.01	Nontraumatic subdural hemorrhage: Subacute
I62.02	Nontraumatic subdural hemorrhage: Chronic
I62.09	Nontraumatic subdural hemorrhage: Unspecified
I62.1	Nontraumatic extradural hemorrhage
I62.9	Intracranial hemorrhage (nontraumatic), unspecified
I63.0	Cerebral infarction due to precerebral artery thrombosis
I63.1	Cerebral infarction due to precerebral artery embolism
I63.2	Cerebral infarction due to unspecified precerebral artery occlusion or stenosis
I63.3	Cerebral infarction due to cerebral artery thrombosis
I63.4	Cerebral infarction due to cerebral artery embolism
I63.5	Cerebral infarction due to unspecified cerebral artery occlusion or stenosis
I63.8	Other cerebral infarction
I63.9	Cerebral infarction, unspecified
I64	Stroke not specified as hemorrhage or infarction
I65.0	Vertebral artery occlusion and stenosis
I65.1	Occlusion and stenosis of the basilar artery
I65.2	Occlusion and stenosis of the carotid artery
I65.3	Occlusion and stenosis of multiple and bilateral precerebral arteries
I65.8	Occlusion and stenosis of other precerebral arteries
I66.0	Occlusion and stenosis of the middle cerebral artery
I66.2	Occlusion and stenosis of the posterior cerebral artery
I66.2	Occlusion and stenosis of the posterior cerebral artery
I66.2	Occlusion and stenosis of the posterior cerebral artery
I66.8	Occlusion and stenosis of other cerebral arteries
I66.9	Occlusion and stenosis of an unspecified cerebral artery
G45.02	Vertebral artery syndrome with basilar symptoms: Complete resolution within 1 to 24 hours
G45.03	Vertebral artery syndrome with basilar symptoms: Complete resolution within less than 1 hour
G45.12	Internal carotid artery syndrome (hemiplegic): Complete resolution within 1 to 24 hours
G45.13	Internal carotid artery syndrome (unilateral): Complete resolution within less than 1 hour
G45.13	Internal carotid artery syndrome (unilateral): Complete resolution within less than 1 hour
G45.13	Internal carotid artery syndrome (unilateral): Complete resolution within less than 1 hour
G45.13	Internal carotid artery syndrome (unilateral): Complete resolution within less than 1 hour
G45.42	Transient global amnesia [amnestic episode]: Complete resolution within 1 to 24 hours
G45.42	Transient global amnesia [amnestic episode]: Complete resolution within 1 to 24 hours
G45.82	Other cerebral transient ischemia and related syndromes: Complete resolution within 1 to 24 hours
G45.83	Other cerebral transient ischemia and related syndromes: Complete resolution within less than 1 hour
G45.89	Other cerebral transient ischemia and related syndromes: Course of recovery unspecified
G45.92	Cerebral transient ischemia, unspecified: Complete recovery within 1 to 24 hours
G45.93	Cerebral transient ischemia, unspecified: Complete recovery within less than 1 hour
G45.99	Cerebral transient ischemia, unspecified: Course of recovery unspecified
G45.99	Cerebral transient ischemia, unspecified: Course of recovery unspecified
G46.0	Middle cerebral artery syndrome
G46.1	Anterior cerebral artery syndrome
G46.2	Posterior cerebral artery syndrome
G46.3	Brainstem syndrome
G46.4	Cerebellar syndrome
G46.7	Other lacunar syndromes
G46.8	Other cerebral vascular syndromes in cerebrovascular disease
I67.10	Cerebral aneurysm (acquired)
I67.2	Cerebral atherosclerosis
I67.4	Hypertensive encephalopathy
I67.4	Hypertensive encephalopathy
I67.5	Moyamoya syndrome
I67.6	Non-purulent thrombosis of the intracranial venous system
I67.7	Cerebral arteritis, not elsewhere classified
I67.80	Vasospasm in subarachnoid hemorrhage
I67.88	Other specified cerebrovascular disorders
I67.9	Cerebrovascular disorder, unspecified
I69.0	Sequelae of subarachnoid hemorrhage
I69.1	Sequelae of intracerebral hemorrhage
I69.2	Sequelae of other non-traumatic intracranial hemorrhage
I69.3	Sequelae of cerebral infarction
I69.4	Sequelae of stroke, not specified as hemorrhage or infarction
I69.8	Sequelae of other and unspecified cerebrovascular disorders
Pulmonary disease
J40	Bronchitis not specified as acute or chronic
J41.0	Simple chronic bronchitis
J41.1	Mucous-purulent chronic bronchitis
J41.8	Mixed forms of simple and mucopurulent chronic bronchitis
J42	Unspecified chronic bronchitis
J43.0	McLeod's syndrome
J43.1	Panlobular emphysema
J43.2	Centrilobular emphysema
J43.8	Other emphysema
J43.9	Emphysema, unspecified
J44.00	Chronic obstructive pulmonary disease with acute lower respiratory tract infection: FEV1 <35% of predicted
J44.00	Chronic obstructive pulmonary disease with acute lower respiratory tract infection: FEV1 <35% of predicted
J44.01	Chronic obstructive pulmonary disease with acute lower respiratory tract infection: FEV1 >=35% and <50% of predicted
J44.02	Chronic obstructive pulmonary disease with acute lower respiratory tract infection: FEV1 >=50% and <70% of predicted Predicted value
J44.03	Chronic obstructive pulmonary disease with acute lower respiratory tract infection: FEV1 >=70% of predicted value
J44.09	Chronic obstructive pulmonary disease with acute lower respiratory tract infection: FEV1 unspecified
J44.10	Chronic obstructive pulmonary disease with acute exacerbation, unspecified: FEV1 <35% of predicted value
J44.11	Chronic obstructive pulmonary disease with acute exacerbation, unspecified: FEV1 >=35% and <50% of predicted value
J44.12	Chronic obstructive pulmonary disease with acute exacerbation, unspecified: FEV1 >=50% and <70% of predicted value
J44.13	Chronic obstructive pulmonary disease with acute exacerbation, unspecified: FEV1 >=70% of predicted value
J44.19	Chronic obstructive pulmonary disease with acute exacerbation, unspecified: FEV1 unspecified
J44.80	Other specified Chronic obstructive pulmonary disease: FEV1 <35% of predicted
J44.81	Other specified chronic obstructive pulmonary disease: FEV1 >=35% and <50% of predicted
J44.82	Other specified chronic obstructive pulmonary disease: FEV1 >=50% and <70% of predicted
J44.83	Other specified chronic obstructive pulmonary disease: FEV1 >=70% of predicted
J44.89	Other specified chronic obstructive pulmonary disease: FEV1 not otherwise specified
J44.90	Chronic obstructive pulmonary disease, unspecified: FEV1 <35% of predicted
J44.91	Chronic obstructive pulmonary disease, unspecified: FEV1 >=35% and <50% of predicted
J44.92	Chronic obstructive pulmonary disease, unspecified: FEV1 >=50% and <70% of predicted
J44.93	Chronic obstructive pulmonary disease, unspecified: FEV1 >=70% of predicted value
J44.99	Chronic obstructive pulmonary disease, unspecified: FEV1 unspecified
J45.00	Predominantly allergic asthma: Reported as well controlled and not severe
J45.01	Predominantly allergic asthma: Reported as partially controlled and not severe
J45.03	Predominantly allergic asthma: Reported as well controlled and severe
J45.04	Predominantly allergic asthma: Reported as partially controlled and severe
J45.09	Predominantly allergic asthma: No information on control status or severity
J45.10	Nonallergic asthma: Reported as well controlled and not severe
J45.11	Nonallergic asthma: Reported as partially controlled and not severe
J45.13	Nonallergic asthma: Reported as well controlled and severe
J45.15	Nonallergic asthma: Reported as uncontrolled and severe
J45.19	Nonallergic asthma: No information on control status or severity
J45.80	Mixed forms of asthma: Reported as well controlled and not severe
J45.81	Mixed forms Bronchial asthma: Described as partially controlled and not severe
J45.82	Mixed forms of bronchial asthma: Described as uncontrolled and not severe
J45.89	Mixed forms of bronchial asthma: No information on control status or severity
J45.90	Bronchial asthma, unspecified: Described as well controlled and not severe
J45.91	Bronchial asthma, unspecified: Described as partially controlled and not severe
J45.92	Bronchial asthma, unspecified: Described as uncontrolled and not severe
J45.93	Bronchial asthma, unspecified: Described as well controlled and severe
J45.94	Bronchial asthma, unspecified: Described as partially controlled and severe
J45.95	Bronchial asthma, unspecified: Described as uncontrolled and severe
J45.99	Bronchial asthma, unspecified: No information on control status or severity
J46	Status asthmaticus
J47	Bronchiectasis
J67.00	Farmer's lung: No information on acute exacerbation
J67.20	Aviculturalist's lung: No information on acute exacerbation
J67.90	Allergic Alveolitis due to unspecified organic dust: No acute exacerbation reported
J60	Coal miner's pneumoconiosis
J61.0	Pneumoconiosis due to asbestos and other inorganic fibers: No acute exacerbation reported
J62.8	Pneumoconiosis due to other silica dust
J64	Unspecified pneumoconiosis
Connective-tissue disorder
M32.1	Systemic lupus erythematosus with involvement of organs or organ systems
M32.8	Other forms of systemic lupus erythematosus
M32.9	Systemic lupus erythematosus, unspecified
M33.2	Polymyositis
M34.0	Progressive systemic sclerosis
M34.1	CR(E)ST syndrome
M34.8	Other forms of systemic sclerosis
M34.9	Systemic sclerosis, unspecified
M05.30	Seropositive chronic polyarthritis with involvement of other organs and organ systems: Multiple sites
M05.34	Seropositive chronic polyarthritis with involvement of other organs and organ systems: Hand [fingers, wrist, metacarpals, joints between these bones]
M05.39	Seropositive chronic polyarthritis with involvement of other organs and organ systems: Unspecified site
M05.80	Other seropositive chronic polyarthritis: Multiple sites
M05.89	Other seropositive chronic polyarthritis: Unspecified site
M06.00	Seronegative chronic polyarthritis: Multiple sites
M06.09	Seronegative chronic polyarthritis: None Specified location
M06.90	Chronic polyarthritis, unspecified: Multiple locations
M06.94	Chronic polyarthritis, unspecified: Hand [fingers, carpus, metacarpus, joints between these bones]
M06.94	Chronic polyarthritis, unspecified: Hand [fingers, carpus, metacarpus, joints between these bones]
M06.98	Chronic polyarthritis, unspecified: Other [neck, head, ribs, trunk, skull, spine]
M06.99	Chronic polyarthritis, unspecified: Unspecified location
M05.10	Pulmonary manifestation of seropositive chronic polyarthritis: Multiple locations
M05.19	Pulmonary manifestation of seropositive chronic polyarthritis: Unspecified location
M35.3	Polymyalgia rheumatica
Peptic ulcer
K25.0	Gastric ulcer: Acute, with bleeding
K25.1	Gastric ulcer: Acute, with perforation
K25.2	Gastric ulcer: Acute, with bleeding and perforation
K25.3	Gastric ulcer: Acute, without bleeding or perforation
K25.4	Gastric ulcer: Chronic or unspecified, with bleeding
K25.5	Gastric ulcer: Chronic or unspecified, with perforation
K25.7	Gastric ulcer: Chronic, without bleeding or perforation
K25.9	Gastric ulcer: Neither described as acute nor chronic, without bleeding or perforation
K26.0	Duodenal ulcer: Acute, with bleeding
K26.1	Duodenal ulcer: Acute, with perforation
K26.2	Duodenal ulcer: Acute, with bleeding and perforation
K26.3	Duodenal ulcer: Acute, without bleeding or perforation
K26.4	Duodenal ulcer: Chronic or unspecified, with bleeding
K26.5	Ulcer Duodenal ulcer: Chronic or unspecified, with perforation
K26.7	Duodenal ulcer: Chronic, without bleeding or perforation
K26.9	Duodenal ulcer: Neither described as acute nor chronic, without bleeding or perforation
K28.0	Jejunal peptic ulcer: Acute, with bleeding
K28.0	Jejunal peptic ulcer: Acute, with bleeding
K28.0	Jejunal peptic ulcer: Acute, with bleeding
K28.1	Jejunal peptic ulcer: Acute, with perforation
K28.3	Jejunal peptic ulcer: Acute, without bleeding or perforation
K28.3	Jejunal peptic ulcer: Acute, without bleeding or perforation
K28.4	Jejunal peptic ulcer: Chronic or unspecified, with bleeding
K28.4	Jejunal peptic ulcer: Chronic or unspecified, with bleeding
K28.4	Jejunal peptic ulcer: Chronic or unspecified, with bleeding
K28.9	Peptic ulcer jejuni: Neither acute nor chronic, without bleeding or perforation
Mild liver disease
K70.2	Alkoholische Fibrose und Sklerose der Leber
K70.3	Alkoholische Leberzirrhose
K73.8	Sonstige chronische Hepatitis, anderenorts nicht klassifiziert
K73.8	Sonstige chronische Hepatitis, anderenorts nicht klassifiziert
K73.9	Chronische Hepatitis, nicht näher bezeichnet
K71.7	Toxische Leberkrankheit mit Fibrose und Zirrhose der Leber
K74.0	Leberfibrose
K74.2	Leberfibrose mit Lebersklerose
K74.3	Primäre biliäre Cholangitis
K74.4	Sekundäre biliäre Zirrhose
K74.5	Biliäre Zirrhose, nicht näher bezeichnet
Diabetes
E10.90	Type 1 diabetes mellitus: Without complications: Not described as derailed
E10.91	Type 1 diabetes mellitus: Without complications: Described as derailed
E11.01	Type 2 diabetes mellitus: With coma: Described as derailed
E11.11	Type 2 diabetes mellitus: With ketoacidosis: Described as derailed
E11.90	Type 2 diabetes mellitus: Without complications: Not described as derailed
E11.91	Type 2 diabetes mellitus: Without complications: Described as derailed
E13.90	Other specified diabetes mellitus: Without complications: Not described as derailed
E13.91	Other specified diabetes mellitus: Without complications: Described as derailed
E14.90	Unspecified diabetes mellitus: Without complications: Not described as derailed
E14.91	Unspecified diabetes mellitus: Without complications: Described as derailed
E13.11	Other specified diabetes mellitus: With ketoacidosis: Described as derailed
E13.41	Other Specified diabetes mellitus: With neurological complications: Designated as decompensated
E10.50	Type 1 diabetes mellitus: With peripheral vascular complications: Not designated as decompensated
E10.51	Type 1 diabetes mellitus: With peripheral vascular complications: Designated as decompensated
E11.50	Type 2 diabetes mellitus: With peripheral vascular complications: Not designated as decompensated
E11.51	Type 2 diabetes mellitus: With peripheral vascular complications: Designated as decompensated
E13.50	Other specified diabetes mellitus: With peripheral vascular complications: Not designated as decompensated
E13.51	Other specified diabetes mellitus: With peripheral vascular complications: Designated as decompensated
Diabetes complications
E10.20	Type 1 diabetes mellitus: With kidney complications: Not designated as derailed
E10.21	Type 1 diabetes mellitus: With kidney complications: Designated as derailed
E11.20	Type 2 diabetes mellitus: With kidney complications: Not designated as derailed
E11.21	Type 2 diabetes mellitus: With kidney complications: Designated as derailed
E13.20	Other specified diabetes mellitus: With kidney complications: Not designated as derailed
E13.21	Other specified diabetes mellitus: With kidney complications: Designated as derailed
E10.30	Type 1 diabetes mellitus: With eye complications: Not designated as derailed
E11.30	Type 2 diabetes mellitus: With eye complications: Not designated as derailed
E11.31	Type 2 diabetes mellitus: With eye complications: Designated as derailed
E11.40	Type 2 diabetes mellitus: With neurological complications: Not designated as Described as derailed
E11.41	Type 2 diabetes mellitus: With neurological complications: Described as derailed
E13.40	Other specified diabetes mellitus: With neurological complications: Not described as derailed
E13.41	Other specified diabetes mellitus: With neurological complications: Described as derailed
Paraplegia
G81.0	Flaccid hemiparesis and hemiplegia
G81.1	Spastic hemiparesis and hemiplegia
G81.9	Hemiparesis and hemiplegia, unspecified
G82.00	Fluctual paraparesis and paraplegia: Acute complete paraplegia of non-traumatic origin
G82.01	Fluctual paraparesis and paraplegia: Acute incomplete paraplegia of non-traumatic origin
G82.02	Fluctual paraparesis and paraplegia: Chronic complete paraplegia
G82.03	Fluctual paraparesis and paraplegia: Chronic incomplete paraplegia
G82.09	Fluctual paraparesis and paraplegia: Unspecified
G82.11	Spastic paraparesis and paraplegia: Acute incomplete paraplegia of non-traumatic origin
G82.12	Spastic paraparesis and paraplegia: Chronic complete paraplegia
G82.13	Spastic paraparesis and paraplegia: Chronic incomplete paraplegia
G82.19	Spastic paraparesis and paraplegia: Unspecified
G82.20	Paraparesis and paraplegia, unspecified: Acute complete paraplegia of non-traumatic origin
G82.21	Paraparesis and paraplegia, unspecified: Acute incomplete paraplegia of non-traumatic origin
G82.22	Paraparesis and paraplegia, unspecified: Chronic complete paraplegia
G82.23	Paraparesis and paraplegia, unspecified: Chronic incomplete paraplegia
G82.23	Paraparesis and paraplegia, unspecified: Chronic incomplete paraplegia
G82.29	Paraparesis and paraplegia, unspecified: Unspecified
G82.29	Paraparesis and paraplegia, unspecified: Unspecified
G82.30	Fluctuating tetraparesis and tetraplegia: Acute complete paraplegia of non-traumatic origin
G82.31	Fluctuating tetraparesis and tetraplegia: Acute incomplete paraplegia of non-traumatic origin
G82.32	Fluctuating tetraparesis and tetraplegia: Chronic complete paraplegia
G82.33	Fluctuating tetraparesis and tetraplegia: Chronic incomplete paraplegia
G82.39	Fluctuating tetraparesis and tetraplegia: Not specified Further specified
G82.41	Spastic tetraparesis and tetraplegia: Acute incomplete paraplegia of non-traumatic origin
G82.42	Spastic tetraparesis and tetraplegia: Chronic complete paraplegia
G82.42	Spastic tetraparesis and tetraplegia: Chronic complete paraplegia
G82.43	Spastic tetraparesis and tetraplegia: Chronic incomplete paraplegia
G82.49	Spastic tetraparesis and tetraplegia: Unspecified
G82.51	Tetraparesis and tetraplegia, unspecified: Acute incomplete paraplegia of non-traumatic origin
G82.53	Tetraparesis and tetraplegia, unspecified: Chronic incomplete paraplegia
Renal disease
N03.1	Chronic Nephritic Syndrome: Focal and Segmental Glomerular Lesions
N03.2	Chronic Nephritic Syndrome: Diffuse Membranous Glomerulonephritis
N03.8	Chronic Nephritic Syndrome: Other Morphological Changes
N03.9	Chronic Nephritic Syndrome: Type of Morphological Change Unspecified
N03.9	Chronic Nephritic Syndrome: Type of Morphological Change Unspecified
N03.9	Chronic Nephritic Syndrome: Type of Morphological Change Unspecified
N03.1	Chronic Nephritic Syndrome: Focal and Segmental Glomerular Lesions
N03.2	Chronic Nephritic Syndrome: Diffuse Membranous Glomerulonephritis
N03.8	Chronic Nephritic Syndrome: Other Morphological Changes
N03.9	Chronic Nephritic Syndrome: Type of Morphological Change Unspecified
N18.1	Chronic kidney disease, stage 1
N18.2	Chronic kidney disease, stage 2
N18.3	Chronic kidney disease, stage 3
N18.4	Chronic kidney disease, stage 4
N18.5	Chronic kidney disease, stage 5
N18.80	Unilateral chronic renal dysfunction
N18.80	Unilateral chronic renal dysfunction
N18.80	Unilateral chronic renal dysfunction
N18.80	Unilateral chronic renal dysfunction
N18.80	Unilateral chronic renal dysfunction
N18.80	Unilateral chronic renal dysfunction
N18.89	Other chronic kidney disease, stage unspecified
N18.9	Chronic kidney disease, unspecified
N19	Unspecified renal failure
N25.0	Renal osteodystrophy
N25.8	Other diseases resulting from damage to renal tubular function
Haematological neoplasms
C81.0	Nodular lymphocyte-predominant Hodgkin lymphoma
C81.1	Nodular sclerosing (classic) Hodgkin lymphoma
C81.1	Nodular sclerosing (classic) Hodgkin lymphoma
C81.2	Mixed cell (classic) Hodgkin lymphoma
C81.7	Other types of (classic) Hodgkin lymphoma
C81.9	Hodgkin lymphoma, unspecified
C82.0	Follicular lymphoma grade I
C82.1	Follicular lymphoma grade II
C82.3	Follicular lymphoma grade IIIa
C82.4	Follicular lymphoma grade IIIb
C82.7	Other types of follicular lymphoma
C82.9	Follicular lymphoma, unspecified
C83.0	Small B-cell lymphoma
C83.1	Mantle cell lymphoma
C83.3	Diffuse large B-cell lymphoma
C83.5	Lymphoblastic Lymphoma
C83.7	Burkitt's lymphoma
C83.8	Other non-follicular lymphomas
C83.9	Non-follicular lymphoma, unspecified
C83.9	Non-follicular lymphoma, unspecified
C84.0	Mycosis fungoides
C84.1	Sézary syndrome
C84.4	Peripheral T-cell lymphoma, unspecified
C84.4	Peripheral T-cell lymphoma, unspecified
C84.4	Peripheral T-cell lymphoma, unspecified
C84.6	Anaplastic large cell lymphoma, ALK-positive
C84.7	Anaplastic large cell lymphoma, ALK-negative
C85.1	B-cell lymphoma, unspecified
C85.2	Mediastinal (thymic) large B-cell lymphoma
C85.7	Other specified types of non-Hodgkin's lymphoma
C85.9	Non-Hodgkin's lymphoma, unspecified
C85.9	Non-Hodgkin's lymphoma, unspecified designated
C90.00	Multiple myeloma: No indication of complete remission
C90.01	Multiple myeloma: In complete remission
C91.00	Acute lymphocytic leukemia [ALL]: No indication of complete remission
C91.00	Acute lymphocytic leukemia [ALL]: No indication of complete remission
C91.00	Acute lymphocytic leukemia [ALL]: No indication of complete remission
C91.10	Chronic B-cell lymphocytic leukemia [CLL]: No indication of complete remission
C91.11	Chronic B-cell lymphocytic leukemia [CLL]: In complete remission
C91.40	Hairy cell leukemia: No indication of complete remission
C91.40	Hairy cell leukemia: No indication of complete remission
C91.60	T-cell prolymphocytic leukemia: No indication of complete remission
C92.00	Acute myeloblastic leukemia [AML]: No indication of complete remission
C92.01	Acute myeloblastic leukemia [AML]: In complete remission
C92.10	Chronic Myeloid leukemia [CML], BCR/ABL-positive: No complete remission specified
C92.11	Chronic myeloid leukemia [CML], BCR/ABL-positive: In complete remission
C92.40	Acute promyelocytic leukemia [PCL]: No complete remission specified
C92.50	Acute myelomonocytic leukemia: No complete remission specified
C92.50	Acute myelomonocytic leukemia: No complete remission specified
C92.80	Acute myeloid leukemia with multilineage dysplasia: No complete remission specified
C92.90	Myeloid leukemia, unspecified: No complete remission specified
C93.10	Chronic myelomonocytic leukemia: No complete remission specified
C93.10	Chronic myelomonocytic leukemia: No complete remission specified
Severe liver disease
K72.9	Liver failure, unspecified
K76.6	Portal hypertension
K76.7	Hepatorenal syndrome
K72.10	Acute-on-chronic liver failure, not elsewhere classified
K72.18	Other and unspecified chronic liver failure, not elsewhere classified
HIV
B20	Infectious and parasitic diseases due to HIV disease [Human Immunodeficiency Virus Disease]
B21	Malignant neoplasms due to HIV disease [Human Immunodeficiency Virus Disease]
B22	Other specified diseases due to HIV disease [Human Immunodeficiency Virus Disease]
B23.8	Other specified conditions due to HIV disease
B24	Unspecified HIV disease [Human Immunodeficiency Virus Disease]
Dementia
F00.0	Demenz bei Alzheimer-Krankheit, mit frühem Beginn (Typ 2)
F00.1	Demenz bei Alzheimer-Krankheit, mit spätem Beginn (Typ 1)
F00.2	Demenz bei Alzheimer-Krankheit, atypische oder gemischte Form
F00.9	Demenz bei Alzheimer-Krankheit, nicht näher bezeichnet
F01.0	Vaskuläre Demenz mit akutem Beginn
F01.1	Multiinfarkt-Demenz
F01.2	Subkortikale vaskuläre Demenz
F01.3	Gemischte kortikale und subkortikale vaskuläre Demenz
F01.8	Sonstige vaskuläre Demenz
F01.9	Vaskuläre Demenz, nicht näher bezeichnet
F02.3	Demenz bei primärem Parkinson-Syndrom
F02.8	Demenz bei anderenorts klassifizierten Krankheitsbildern
F03	Nicht näher bezeichnete Demenz
F05.1	Delir bei Demenz

## Sheet: -
ICD-10-GM code	Secondary malignant neoplasm of	all hospital cases	cases receiving SPC	cases receiving SPC / all hospital cases (%)		C00-14	C16	C18 - 20	C25	C34	C43	C50	C53	C54 - 55	C56	C61	C64	C67
C78.0	Lung	96643	13851	0.143321		0.128853	0.154316	0.11219	0.170706	0.138965	0.15353	0.187126	0.20531	0.138329	0.205357	0.151253	0.140266	0.128021
C78.1	Mediastinum	1831	239	0.13053		0.136364	0	0.176471	0	0.133117	0.2125	0.191729	0.230769	0	0	0	0.0843373	0.128205
C78.2	Pleura	40807	6554	0.16061		0.178571	0.20515	0.163831	0.211492	0.143168	0.207589	0.170089	0.26699	0.223176	0.173179	0.179669	0.186176	0.199041
C78.3	Other and unspecified respiratory organs	413	25	0.0605327		0	0	0	0	0.163636	0	0.25	0	0	0	0	0
C78.4	Small intestine	2200	241	0.109545		0	0.0952381	0.0790378	0.168831	0.159609	0.123077	0.191781	0	0.0736842	0.0982659	0	0.150685	0
C78.5	Large intestine and rectum	3137	323	0.102965		0	0.109434	0.100806	0.115942	0.125806	0.163793	0.108303	0.148148	0.101852	0.0870098	0.0406504	0	0.129496
C78.6	Retroperitoneum and peritoneum	67720	11206	0.165475		0.15942	0.148873	0.134593	0.205647	0.247468	0.23676	0.225386	0.204505	0.167251	0.141303	0.164995	0.178099	0.196818
C78.7	Liver and intrahepatic bile ducts	146425	20442	0.139607		0.149499	0.126433	0.0912703	0.141818	0.162471	0.175332	0.192652	0.221258	0.185214	0.206128	0.18138	0.193035	0.149769
C78.8	Secondary malignant neoplasms of other and unspecified digestive organs	7636	1267	0.165925		0.120879	0.163677	0.124724	0.155483	0.182712	0.21095	0.195938	0.228571	0.17284	0.130996	0.174194	0.116352	0.194444
C79.0	Kidney and renal pelvis	3393	643	0.189508		0.231707	0.282051	0.149194	0.25	0.186603	0.168831	0.223958	0.5	0.15625	0.119048	0.218391	0.0928571	0.180952
C79.1	Bladder and other and unspecified urinary organs	1421	186	0.130894			0	0.0926966	0	0.333333	0.255319	0.169355	0.145299	0.141176	0.196262	0.10453	0	0.12069
C79.2	Skin	9915	1551	0.15643		0.213376	0.21223	0.128834	0.232653	0.206689	0.0604797	0.22069	0.261364	0.130653	0.187179	0.184397	0.19469	0.169154
C79.3	Brain and meninges	62923	11191	0.177852		0.19171	0.232719	0.181755	0.226601	0.165855	0.170311	0.218792	0.264706	0.204301	0.221774	0.221408	0.163546	0.192537
C79.4	Secondary malignant neoplasms of other and unspecified parts of the nervous system	2189	456	0.208314		0.16129	0.388889	0.236364	0	0.234783	0.195652	0.210084		0	0	0.172805	0.191919	0.139535
C79.5	Bone and bone marrow	132427	22537	0.170184		0.192327	0.19403	0.189348	0.210666	0.183586	0.205757	0.185005	0.223881	0.201688	0.263158	0.121216	0.184077	0.167765
C79.6	Ovaries	2001	195	0.0974513			0.158809	0.0829384	0.244444	0.0757576	0	0.112403	0	0.0306748	0		0	0
C79.7	Adrenal gland	22965	3825	0.166558		0.225352	0.170732	0.155636	0.179104	0.159568	0.226087	0.251023	0.142857	0.20202	0.324786	0.15812	0.165405	0.175074
C79.81	Breast	732	58	0.079235			0	0	0	0.196721	0	0.0596206		0	0		0	0
C79.82	Genital organs	1846	167	0.0904659		0	0.111111	0.112272	0	0.16129	0	0.147651	0.0555556	0.0786885	0.0883978	0.0493151	0	0.146667
C79.83	Pericardium	1421	246	0.173118		0	0.289474	0	0	0.173295	0.25	0.176471			0.380952	0	0.26087	0
C79.84	Other cardiac	224	37	0.165179		0.3125		0	0	0.304762	0	0		0			0
C79.85	Connective tissue and other soft tissue of the neck	623	60	0.0963082		0.0822368	0	0		0.192308	0.121951	0				0.15625	0
C79.86	Connective tissue and other soft tissue of the extremities	941	160	0.170032			0	0.246154	0	0.194226	0.111111	0.179104		0.25	0	0	0.106667	0.361111
C79.88	Secondary malignant neoplasm of other specified locations	20466	2757	0.134711		0.112661	0.106959	0.101262	0.137592	0.178128	0.157946	0.110072	0.155039	0.103876	0.102041	0.122513	0.142503	0.119554
C79.9	unspecified location	1673	194	0.115959		0	0.145455	0.102941	0.198198	0.141304	0.0935673	0.110236		0.205882	0.112903	0.0990099	0.0645161	0.0985915
		ICD-10 -GM code	oral cavity / throat			stomach			intestine / rectum			pancreas			lung			malignant melanoma			breast			cervix			uterus (without cervix)			ovar			prostate			kidney			bladder							Overview
		ICD-10 -GM code	all hospital cases	specialized palliative care		all hospital cases	specialized palliative care		all hospital cases	specialized palliative care		all hospital cases	specialized palliative care		all hospital cases	specialized palliative care		all hospital cases	specialized palliative care		all hospital cases	specialized palliative care		all hospital cases	specialized palliative care		all hospital cases	specialized palliative care		all hospital cases	specialized palliative care		all hospital cases	specialized palliative care		all hospital cases	specialized palliative care		all hospital cases	specialized palliative care						all hospital cases
		ICD-10 -GM code	all hospital cases	all hospital cases		all hospital cases	all hospital cases		all hospital cases	all hospital cases		all hospital cases	all hospital cases		all hospital cases	all hospital cases		all hospital cases	all hospital cases		all hospital cases	all hospital cases		all hospital cases	all hospital cases		all hospital cases	all hospital cases		all hospital cases	all hospital cases		all hospital cases	all hospital cases		all hospital cases	all hospital cases		all hospital cases	all hospital cases						all hospital cases			fatal hospital cases
total number of hospital cases		total number of hospital cases	64973	2786	0.0428793	55714	3800	0.0682055	181464	8824	0.0486267	77490	7831	0.101058	254444	19845	0.0779936	44705	1628	0.0364165	207681	9307	0.0448139	18215	1118	0.061378	27961	1401	0.0501055	35523	3232	0.0909833	158001	5658	0.0358099	37420	2069	0.0552913	129135	2883	0.0223255
Total number of codes for secondary malignant neoplasms		Total number of codes for secondary malignant neoplasms	28621	2522		39672	5257		142729	14553		65369	9817		276803	40368		28938	3888		120785	18526		9803	1486		14041	1992		31995	4878		68129	8176		24386	3878		26479	3500
Secondary malignant neoplasm of	ICD-10 -GM code	ICD-10 -GM code	case number	case number		case number	case number		case number	case number		case number	case number		case number	case number		case number	case number		case number	case number		case number	case number		case number	case number		case number	case number		case number	case number		case number	case number		case number	case number					C79.9	93	0	368	10.5
Lymph nodes of the head, face, and neck	C77.0	C77.0	15649	599	0.0382772	285	35	0.122807	313	37	0.118211	166	17	0.10241	4225	475	0.112426	1053	49	0.0465337	964	112	0.116183	100	10	0.1	87	17	0.195402	129	24	0.186047	625	45	0.072	138	25	0.181159	156	25	0.160256				ICD-10 -GM code	Median	Min	Max	Median
Intrathoracic lymph nodes	C77.1	C77.1	1027	106	0.103213	1526	127	0.0832241	2043	218	0.106706	775	96	0.123871	64653	5710	0.0883176	630	74	0.11746	2810	428	0.152313	225	41	0.182222	241	34	0.141079	376	53	0.140957	1712	151	0.0882009	1073	152	0.141659	694	82	0.118156				C77.0	285	87	15649	26
Intraabdominal lymph nodes	C77.2	C77.2	193	25	0.129534	7799	554	0.0710347	23698	1171	0.0494135	10706	859	0.0802354	3815	612	0.160419	523	69	0.131931	1101	175	0.158946	1007	103	0.102284	1144	111	0.097028	2095	251	0.119809	4154	408	0.0982186	1585	194	0.122397	2444	249	0.101882				C77.1	1027	225	64653	95
Axillary lymph nodes and upper extremity lymph nodes	C77.3	C77.3	129	23	0.178295	89	16	0.179775	190	24	0.126316	61	6	0.0983607	1382	178	0.128799	2590	103	0.0397683	26552	981	0.0369464	42	0	0	79	6	0.0759494	213	33	0.15493	179	16	0.0893855	74	0	0	64	12	0.1875				C77.2	2095	193	23698	154
Inguinal lymph nodes and lower extremity lymph nodes	C77.4	C77.4	27	0	0	25	0	0	684	59	0.0862573	43	0	0	273	49	0.179487	2083	93	0.0446471	147	19	0.129252	268	28	0.104478	180	20	0.111111	264	19	0.0719697	888	97	0.109234	38	0	0	524	49	0.0935115				C77.3	129	42	26552	14
Intrapelvic lymph nodes	C77.5	C77.5	25	0	0	93	0	0	3852	150	0.0389408	91	16	0.175824	237	35	0.147679	310	21	0.0677419	127	20	0.15748	1983	74	0.0373172	1330	57	0.0428571	844	72	0.0853081	6209	301	0.048478	172	17	0.0988372	3545	175	0.0493653				C77.4	264	25	2083	12
Lymph nodes of multiple regions	C77.8	C77.8	529	108	0.204159	997	148	0.148445	1941	300	0.15456	866	114	0.13164	6681	944	0.141296	700	151	0.215714	1493	368	0.246484	503	67	0.133201	398	66	0.165829	556	118	0.21223	3360	309	0.0919643	484	108	0.22314	1184	163	0.137669				C77.5	310	25	6209	27
Lymph nodes, unspecified	C77.9	C77.9	232	28	0.12069	362	47	0.129834	1008	127	0.125992	674	96	0.142433	1675	305	0.18209	324	38	0.117284	1025	152	0.148293	141	29	0.205674	134	26	0.19403	233	39	0.167382	1519	167	0.109941	266	56	0.210526	648	64	0.0987654				C77.8	866	398	6681	94
lung	C78.0	C78.0	3958	510	0.128853	2456	379	0.154316	22970	2577	0.11219	7633	1303	0.170706	24668	3428	0.138965	3895	598	0.15353	11356	2125	0.187126	1130	232	0.20531	2429	336	0.138329	1456	299	0.205357	4628	700	0.151253	6174	866	0.140266	3890	498	0.128021				C77.9	362	134	1675	45
mediastinum	C78.1	C78.1	66	9	0.136364	52	0	0	119	21	0.176471	36	0	0	924	123	0.133117	80	17	0.2125	266	51	0.191729	26	6	0.230769	27	0	0	55	0	0	58	0	0	83	7	0.0843373	39	5	0.128205				C78.0	3958	1130	24668	529
pleura	C78.2	C78.2	588	105	0.178571	1204	247	0.20515	1587	260	0.163831	1253	265	0.211492	21597	3092	0.143168	448	93	0.207589	8278	1408	0.170089	206	55	0.26699	466	104	0.223176	3020	523	0.173179	846	152	0.179669	897	167	0.186176	417	83	0.199041				C78.1	58	26	924	5
other and unspecified Respiratory Organs	C78.3	C78.3	21	0	0	19	0	0	49	0	0	14	0	0	110	18	0.163636	40	0	0	28	7	0.25	11	0	0	10	0	0	61	0	0	15	0	0	35	0	0	0	0					C78.2	897	206	21597	160
Small Intestine	C78.4	C78.4	5	0	0	84	8	0.0952381	582	46	0.0790378	154	26	0.168831	307	49	0.159609	260	32	0.123077	146	28	0.191781	31	0	0	95	7	0.0736842	346	34	0.0982659	31	0	0	73	11	0.150685	86	0	0				C78.3	21	0	110	0
Colon and Rectum	C78.5	C78.5	12	0	0	265	29	0.109434	496	50	0.100806	207	24	0.115942	310	39	0.125806	116	19	0.163793	277	30	0.108303	108	16	0.148148	216	22	0.101852	816	71	0.0870098	123	5	0.0406504	52	0	0	139	18	0.129496				C78.4	95	5	582	14
Retroperitoneum and Peritoneum	C78.6	C78.6	138	22	0.15942	9760	1453	0.148873	17995	2422	0.134593	9988	2054	0.205647	3160	782	0.247468	642	152	0.23676	4215	950	0.225386	1110	227	0.204505	2565	429	0.167251	14522	2052	0.141303	1097	181	0.164995	831	148	0.178099	1697	334	0.196818				C78.5	207	12	816	19
Liver and Intrahepatic Bile Ducts	C78.7	C78.7	1398	209	0.149499	8115	1026	0.126433	47058	4295	0.0912703	26527	3762	0.141818	28762	4673	0.162471	2635	462	0.175332	15733	3031	0.192652	922	204	0.221258	1285	238	0.185214	3231	666	0.206128	5188	941	0.18138	2326	449	0.193035	3245	486	0.149769				C78.6	2565	138	17995	385
Secondary Malignant Neoplasm of Other Unspecified Digestive Organs	C78.8	C78.8	182	22	0.120879	446	73	0.163677	906	113	0.124724	611	95	0.155483	2441	446	0.182712	621	131	0.21095	837	164	0.195938	70	16	0.228571	81	14	0.17284	542	71	0.130996	155	27	0.174194	636	74	0.116352	108	21	0.194444				C78.7	3245	922	47058	641
Kidney and Renal Pelvis	C79.0	C79.0	82	19	0.231707	39	11	0.282051	248	37	0.149194	140	35	0.25	2090	390	0.186603	154	26	0.168831	192	43	0.223958	42	21	0.5	32	5	0.15625	42	5	0.119048	87	19	0.218391	140	13	0.0928571	105	19	0.180952				C78.8	542	70	2441	49
Bladder and Other Unspecified Urinary Organs	C79.1	C79.1	0	0		52	0	0	356	33	0.0926966	21	0	0	78	26	0.333333	47	12	0.255319	124	21	0.169355	117	17	0.145299	85	12	0.141176	107	21	0.196262	287	30	0.10453	31	0	0	116	14	0.12069				C79.0	105	32	2090	17
Skin	C79.2	C79.2	314	67	0.213376	278	59	0.21223	1141	147	0.128834	245	57	0.232653	1495	309	0.206689	2877	174	0.0604797	2320	512	0.22069	88	23	0.261364	199	26	0.130653	390	73	0.187179	141	26	0.184397	226	44	0.19469	201	34	0.169154				C79.1	85	0	356	6
Brain and Meninges	C79.3	C79.3	579	111	0.19171	868	202	0.232719	2883	524	0.181755	406	92	0.226601	40662	6744	0.165855	4527	771	0.170311	8163	1786	0.218792	238	63	0.264706	465	95	0.204301	496	110	0.221774	1364	302	0.221408	1602	262	0.163546	670	129	0.192537				C79.2	278	88	2877	38
Secondary Malignant Neoplasm of Other Unspecified Parts of the Nervous System	C79.4	C79.4	31	5	0.16129	54	21	0.388889	110	26	0.236364	48	0	0	920	216	0.234783	138	27	0.195652	357	75	0.210084	0	0		20	0	0	16	0	0	353	61	0.172805	99	19	0.191919	43	6	0.139535				C79.3	868	238	40662	161
Bone and Bone Marrow	C79.5	C79.5	1955	376	0.192327	2814	546	0.19403	6628	1255	0.189348	3019	636	0.210666	41098	7545	0.183586	2119	436	0.205757	28956	5357	0.185005	804	180	0.223881	1185	239	0.201688	646	170	0.263158	33032	4004	0.121216	5313	978	0.184077	4858	815	0.167765				C79.4	54	0	920	12
Ovary	C79.6	C79.6	0	0		403	64	0.158809	844	70	0.0829384	90	22	0.244444	66	5	0.0757576	5	0	0	258	29	0.112403	69	0	0	163	5	0.0306748	74	0	0	0	0		18	0	0	11	0	0				C79.5	3019	646	41098	441
Adrenal gland	C79.7	C79.7	142	32	0.225352	615	105	0.170732	1375	214	0.155636	603	108	0.179104	16927	2701	0.159568	575	130	0.226087	733	184	0.251023	49	7	0.142857	99	20	0.20202	117	38	0.324786	468	74	0.15812	925	153	0.165405	337	59	0.175074				C79.6	69	0	844	0
breast	C79.81	C79.81	0	0		28	0	0	15	0	0	20	0	0	183	36	0.196721	40	0	0	369	22	0.0596206	0	0		6	0	0	37	0	0	0	0		25	0	0	9	0	0				C79.7	575	49	16927	63
genital organs	C79.82	C79.82	5	0	0	45	5	0.111111	383	43	0.112272	14	0	0	62	10	0.16129	27	0	0	149	22	0.147651	126	7	0.0555556	305	24	0.0786885	181	16	0.0883978	365	18	0.0493151	34	0	0	150	22	0.146667				C79.81	20	0	369	0
pericardium	C79.83	C79.83	19	0	0	38	11	0.289474	29	0	0	12	0	0	1056	183	0.173295	20	5	0.25	187	33	0.176471	0	0		0	0		21	8	0.380952	11	0	0	23	6	0.26087	5	0	0				C79.82	126	5	383	6
Other heart	C79.84	C79.84	16	5	0.3125	0	0		13	0	0	13	0	0	105	32	0.304762	26	0	0	16	0	0	0	0		16	0	0	0	0		0	0		19	0	0	0	0					C79.83	20.5	0	1056	0
connective tissue and other soft tissues of the neck	C79.85	C79.85	304	25	0.0822368	8	0	0	11	0	0	0	0		130	25	0.192308	41	5	0.121951	78	0	0	0	0		0	0		0	0		32	5	0.15625	19	0	0	0	0					C79.84	13	0	105	0
connective tissue and other soft tissues of the extremities	C79.86	C79.86	15	11	0.733333	22	0	0	65	16	0.246154	8	0	0	381	74	0.194226	189	21	0.111111	67	12	0.179104	0	0		20	5	0.25	18	0	0	45	0	0	75	8	0.106667	36	13	0.361111				C79.85	15	0	304	0
Secondary malignant neoplasm of other specified sites	C79.88	C79.88	932	105	0.112661	776	83	0.106959	2933	297	0.101262	814	112	0.137592	5962	1062	0.178128	1032	163	0.157946	3207	353	0.110072	387	60	0.155039	645	67	0.103876	1029	105	0.102041	955	117	0.122513	807	115	0.142503	987	118	0.119554				C79.86	36	0	381	0
Secondary malignant neoplasm of unspecified site	C79.9	C79.9	48	0	0	55	8	0.145455	204	21	0.102941	111	22	0.198198	368	52	0.141304	171	16	0.0935673	254	28	0.110236	0	0		34	7	0.205882	62	7	0.112903	202	20	0.0990099	93	6	0.0645161	71	7	0.0985915				C79.88	955	387	5962	88
Secondary malignant neoplasm of	ICD-10 -GM code	ICD-10 -GM code	case number	case number		case number	case number		case number	case number		case number	case number		case number	case number		case number	case number		case number	case number		case number	case number		case number	case number		case number	case number		case number	case number		case number	case number		case number	case number					C79.9	93	0	368	10.5
frequency of specialized in-patient palliative care
	≤12,5%
	12,5 %- 15,9%
	16% - 19,5%
	≥20%
[truncated: 13 more columns]

## Sheet: SPC - Mets Nodes
			oral cavity / throat			stomach			intestine / rectum			pancreas			lung			malignant melanoma			breast			cervix			uterus (without cervix)			ovary			prostate			kidney			bladder
			C00 - 14			C16			C18 - 20			C25			C34			C43			C50			C53			C54 - 55			C56			C61			C64			C67
			all hospital cases	specialized palliative care	%	all hospital cases	specialized palliative care	%	all hospital cases	specialized palliative care	%	all hospital cases	specialized palliative care	%	all hospital cases	specialized palliative care	%	all hospital cases	specialized palliative care	%	all hospital cases	specialized palliative care	%	all hospital cases	specialized palliative care	%	all hospital cases	specialized palliative care	%	all hospital cases	specialized palliative care	%	all hospital cases	specialized palliative care	%	all hospital cases	specialized palliative care	%	all hospital cases	specialized palliative care	%
		total number of hospital cases	64973	2786	0.0428793	55714	3800	0.0682055	181464	8824	0.0486267	77490	7831	0.101058	254444	19845	0.0779936	44705	1628	0.0364165	207681	9307	0.0448139	18215	1118	0.061378	27961	1401	0.0501055	35523	3232	0.0909833	158001	5658	0.0358099	37420	2069	0.0552913	129135	2883	0.0223255
ICD-10 -GM code	Secondary malignant neoplasm of	ICD-10 -GM code	case number	case number	%	case number	case number	%	case number	case number	%	case number	case number	%	case number	case number	%	case number	case number	%	case number	case number	%	case number	case number	%	case number	case number	%	case number	case number	%	case number	case number	%	case number	case number	%	case number	case number	%
C78.0	lung	C78.0	3958	510	0.128853	2456	379	0.154316	22970	2577	0.11219	7633	1303	0.170706	24668	3428	0.138965	3895	598	0.15353	11356	2125	0.187126	1130	232	0.20531	2429	336	0.138329	1456	299	0.205357	4628	700	0.151253	6174	866	0.140266	3890	498	0.128021
C78.1	mediastinum	C78.1	66	9	0.136364	52	0	0	119	21	0.176471	36	0	0	924	123	0.133117	80	17	0.2125	266	51	0.191729	26	6	0.230769	27	0	0	55	0	0	58	0	0	83	7	0.0843373	39	5	0.128205
C78.2	pleura	C78.2	588	105	0.178571	1204	247	0.20515	1587	260	0.163831	1253	265	0.211492	21597	3092	0.143168	448	93	0.207589	8278	1408	0.170089	206	55	0.26699	466	104	0.223176	3020	523	0.173179	846	152	0.179669	897	167	0.186176	417	83	0.199041
C78.3	other and unspecified Respiratory Organs	C78.3	21	0	0	19	0	0	49	0	0	14	0	0	110	18	0.163636	40	0	0	28	7	0.25	11	0	0	10	0	0	61	0	0	15	0	0	35	0	0	0	0
C78.4	Small Intestine	C78.4	5	0	0	84	8	0.0952381	582	46	0.0790378	154	26	0.168831	307	49	0.159609	260	32	0.123077	146	28	0.191781	31	0	0	95	7	0.0736842	346	34	0.0982659	31	0	0	73	11	0.150685	86	0	0
C78.5	Colon and Rectum	C78.5	12	0	0	265	29	0.109434	496	50	0.100806	207	24	0.115942	310	39	0.125806	116	19	0.163793	277	30	0.108303	108	16	0.148148	216	22	0.101852	816	71	0.0870098	123	5	0.0406504	52	0	0	139	18	0.129496
C78.6	Retroperitoneum and Peritoneum	C78.6	138	22	0.15942	9760	1453	0.148873	17995	2422	0.134593	9988	2054	0.205647	3160	782	0.247468	642	152	0.23676	4215	950	0.225386	1110	227	0.204505	2565	429	0.167251	14522	2052	0.141303	1097	181	0.164995	831	148	0.178099	1697	334	0.196818
C78.7	Liver and Intrahepatic Bile Ducts	C78.7	1398	209	0.149499	8115	1026	0.126433	47058	4295	0.0912703	26527	3762	0.141818	28762	4673	0.162471	2635	462	0.175332	15733	3031	0.192652	922	204	0.221258	1285	238	0.185214	3231	666	0.206128	5188	941	0.18138	2326	449	0.193035	3245	486	0.149769
C78.8	Secondary Malignant Neoplasm of Other Unspecified Digestive Organs	C78.8	182	22	0.120879	446	73	0.163677	906	113	0.124724	611	95	0.155483	2441	446	0.182712	621	131	0.21095	837	164	0.195938	70	16	0.228571	81	14	0.17284	542	71	0.130996	155	27	0.174194	636	74	0.116352	108	21	0.194444
C79.0	Kidney and Renal Pelvis	C79.0	82	19	0.231707	39	11	0.282051	248	37	0.149194	140	35	0.25	2090	390	0.186603	154	26	0.168831	192	43	0.223958	42	21	0.5	32	5	0.15625	42	5	0.119048	87	19	0.218391	140	13	0.0928571	105	19	0.180952
C79.1	Bladder and Other Unspecified Urinary Organs	C79.1	0	0		52	0	0	356	33	0.0926966	21	0	0	78	26	0.333333	47	12	0.255319	124	21	0.169355	117	17	0.145299	85	12	0.141176	107	21	0.196262	287	30	0.10453	31	0	0	116	14	0.12069
C79.2	Skin	C79.2	314	67	0.213376	278	59	0.21223	1141	147	0.128834	245	57	0.232653	1495	309	0.206689	2877	174	0.0604797	2320	512	0.22069	88	23	0.261364	199	26	0.130653	390	73	0.187179	141	26	0.184397	226	44	0.19469	201	34	0.169154
C79.3	Brain and Meninges	C79.3	579	111	0.19171	868	202	0.232719	2883	524	0.181755	406	92	0.226601	40662	6744	0.165855	4527	771	0.170311	8163	1786	0.218792	238	63	0.264706	465	95	0.204301	496	110	0.221774	1364	302	0.221408	1602	262	0.163546	670	129	0.192537
C79.4	Secondary Malignant Neoplasm of Other Unspecified Parts of the Nervous System	C79.4	31	5	0.16129	54	21	0.388889	110	26	0.236364	48	0	0	920	216	0.234783	138	27	0.195652	357	75	0.210084	0	0		20	0	0	16	0	0	353	61	0.172805	99	19	0.191919	43	6	0.139535
C79.5	Bone and Bone Marrow	C79.5	1955	376	0.192327	2814	546	0.19403	6628	1255	0.189348	3019	636	0.210666	41098	7545	0.183586	2119	436	0.205757	28956	5357	0.185005	804	180	0.223881	1185	239	0.201688	646	170	0.263158	33032	4004	0.121216	5313	978	0.184077	4858	815	0.167765
C79.6	Ovary	C79.6	0	0		403	64	0.158809	844	70	0.0829384	90	22	0.244444	66	5	0.0757576	5	0	0	258	29	0.112403	69	0	0	163	5	0.0306748	74	0	0	0	0		18	0	0	11	0	0
C79.7	Adrenal gland	C79.7	142	32	0.225352	615	105	0.170732	1375	214	0.155636	603	108	0.179104	16927	2701	0.159568	575	130	0.226087	733	184	0.251023	49	7	0.142857	99	20	0.20202	117	38	0.324786	468	74	0.15812	925	153	0.165405	337	59	0.175074
C79.81	breast	C79.81	0	0		28	0	0	15	0	0	20	0	0	183	36	0.196721	40	0	0	369	22	0.0596206	0	0		6	0	0	37	0	0	0	0		25	0	0	9	0	0
C79.82	genital organs	C79.82	5	0	0	45	5	0.111111	383	43	0.112272	14	0	0	62	10	0.16129	27	0	0	149	22	0.147651	126	7	0.0555556	305	24	0.0786885	181	16	0.0883978	365	18	0.0493151	34	0	0	150	22	0.146667
C79.83	pericardium	C79.83	19	0	0	38	11	0.289474	29	0	0	12	0	0	1056	183	0.173295	20	5	0.25	187	33	0.176471	0	0		0	0		21	8	0.380952	11	0	0	23	6	0.26087	5	0	0
C79.84	Other heart	C79.84	16	5	0.3125	0	0		13	0	0	13	0	0	105	32	0.304762	26	0	0	16	0	0	0	0		16	0	0	0	0		0	0		19	0	0	0	0
C79.85	connective tissue and other soft tissues of the neck	C79.85	304	25	0.0822368	8	0	0	11	0	0	0	0		130	25	0.192308	41	5	0.121951	78	0	0	0	0		0	0		0	0		32	5	0.15625	19	0	0	0	0
C79.86	connective tissue and other soft tissues of the extremities	C79.86	15	11	0.733333	22	0	0	65	16	0.246154	8	0	0	381	74	0.194226	189	21	0.111111	67	12	0.179104	0	0		20	5	0.25	18	0	0	45	0	0	75	8	0.106667	36	13	0.361111
C79.88	Secondary malignant neoplasm of other specified sites	C79.88	932	105	0.112661	776	83	0.106959	2933	297	0.101262	814	112	0.137592	5962	1062	0.178128	1032	163	0.157946	3207	353	0.110072	387	60	0.155039	645	67	0.103876	1029	105	0.102041	955	117	0.122513	807	115	0.142503	987	118	0.119554
C79.9	Secondary malignant neoplasm of unspecified site	C79.9	48	0	0	55	8	0.145455	204	21	0.102941	111	22	0.198198	368	52	0.141304	171	16	0.0935673	254	28	0.110236	0	0		34	7	0.205882	62	7	0.112903	202	20	0.0990099	93	6	0.0645161	71	7	0.0985915
frequency of specialized in-patient palliative care
	≤12,5%
	12,5 %- 15,9%
	16% - 19,5%
	≥20%
