# Supplementary material
Source: Research Square preprint supplement (doi:10.21203/rs.3.rs-8610908/v1)
Supplement: Supplementary file 3 [file 29d157c4997cb970526a20d1.xlsx]

## Sheet: suppl.tab_1_code-definition
ICD-10-GM code	Description
Malignoma of the
C00 - 14	oral cavity
C16	stomach
C18 - 20	intestine / rectum
C25	pancreas
C34	lung
C43	malignant melanoma
C50	breast
C53	cervix uteri
C54 - 55	corpus uteri
C56	ovary
C61	prostate
C64	kidney cancer
C67	bladder cancer
Secondary malignant neoplasm of
C77.0	Lymph nodes of the head, face, and neck
C77.1	Intrathoracic lymph nodes
C77.2	Intraabdominal lymph nodes
C77.3	Axillary lymph nodes and upper extremity lymph nodes
C77.4	Inguinal lymph nodes and lower extremity lymph nodes
C77.5	Intrapelvic lymph nodes
C77.8	Lymph nodes of multiple regions
C77.9	Lymph nodes, unspecified
C78.0	lung
C78.1	mediastinum
C78.2	pleura
C78.3	other and unspecified Respiratory Organs
C78.4	Small Intestine
C78.5	Colon and Rectum
C78.6	Retroperitoneum and Peritoneum
C78.7	Liver and Intrahepatic Bile Ducts
C78.8	Secondary Malignant Neoplasm of Other Unspecified Digestive Organs
C79.0	Kidney and Renal Pelvis
C79.1	Bladder and Other Unspecified Urinary Organs
C79.2	Skin
C79.3	Brain and Meninges
C79.4	Secondary Malignant Neoplasm of Other Unspecified Parts of the Nervous System
C79.5	Bone and Bone Marrow
C79.6	Ovary
C79.7	Adrenal gland
C79.81	breast
C79.82	genital organs
C79.83	pericardium
C79.84	Other heart
C79.85	connective tissue and other soft tissues of the neck
C79.86	connective tissue and other soft tissues of the extremities
C79.88	Secondary malignant neoplasm of other specified sites
C79.9	Secondary malignant neoplasm of unspecified site
Acute myocardial infarction
I21.0	Acute transmural myocardial infarction of the anterior wall
I21.1	Acute transmural myocardial infarction of the posterior wall
I21.2	Acute transmural myocardial infarction at other locations
I21.3	Acute transmural myocardial infarction at unspecified location
I21.4	Acute subendocardial myocardial infarction
I21.9	Acute myocardial infarction, unspecified
I25.20	Myocardial infarction occurred between 29 days and less than 4 months ago
I25.21	Myocardial infarction occurred between 4 months and less than 1 year ago
I25.22	Myocardial infarction occurred one year or more ago
I25.29	Myocardial infarction occurred unspecified
Congestive heart failure
I50.00	Primary right heart failure
I50.01	Secondary right heart failure
I50.02	Right heart failure without symptoms
I50.03	Right heart failure with symptoms during strenuous exercise
I50.04	Right heart failure with symptoms during mild exercise
I50.05	Right heart failure with symptoms at rest
I50.11	Left heart failure: without symptoms
I50.12	Left heart failure: with symptoms during strenuous exercise
I50.13	Left heart failure: with symptoms during mild exercise
I50.14	Left heart failure: with symptoms at rest
I50.19	Left heart failure: unspecified
I50.9	Heart failure, unspecified
Peripheral vascular disease
I70.20	Atherosclerosis of the extremity arteries: pelvic-leg type, without symptoms
I70.21	Atherosclerosis of the extremity arteries: pelvic-leg type, with exercise-induced ischemic pain, walking distance of 200 m or more
I70.22	Atherosclerosis of the extremity arteries: pelvic-leg type, with exercise-induced ischemic pain, walking distance less than 200 m
I70.23	Atherosclerosis of the extremity arteries: pelvic-leg type, with resting pain
I70.24	Atherosclerosis of the extremity arteries: pelvic-leg type, with ulceration
I70.25	Atherosclerosis of the extremity arteries: pelvic-leg type, with gangrene
I70.26	Atherosclerosis of the extremity arteries: shoulder-arm type, all stages
I70.29	Atherosclerosis of the extremity arteries: other and unspecified
I71.00	Dissektion der Aorta nicht näher bezeichneter Lokalisation, ohne Angabe einer Ruptur
I71.01	Dissektion der Aorta thoracica, ohne Angabe einer Ruptur
I71.02	Dissektion der Aorta abdominalis, ohne Angabe einer Ruptur
I71.03	Dissektion der Aorta, thorakoabdominal, ohne Angabe einer Ruptur
I71.2	Aneurysma der Aorta thoracica, ohne Angabe einer Ruptur
I71.3	Aneurysma der Aorta abdominalis, rupturiert
I71.3	Aneurysma der Aorta abdominalis, rupturiert
I71.4	Aneurysma der Aorta abdominalis, ohne Angabe einer Ruptur
I71.6	Aortenaneurysma, thorakoabdominal, ohne Angabe einer Ruptur
I71.9	Aortenaneurysma nicht näher bezeichneter Lokalisation, ohne Angabe einer Ruptur
I73.0	Raynaud's syndrome
I73.8	Other specified peripheral vascular diseases
I73.9	Peripheral vascular disease, not specified further specified
Cerebral vascular accidents (except hemiplegia)
I60.1	Subarachnoid hemorrhage originating from the middle cerebral artery
I60.2	Subarachnoid hemorrhage originating from the anterior communicating artery
I60.6	Subarachnoid hemorrhage originating from other intracranial arteries
I60.7	Subarachnoid hemorrhage originating from an unspecified intracranial artery
I60.8	Other subarachnoid hemorrhage
I60.9	Subarachnoid hemorrhage, unspecified
I61.0	Intracerebral hemorrhage into the cerebral hemisphere, subcortical
I61.1	Intracerebral hemorrhage into the cerebral hemisphere, cortical
I61.2	Intracerebral hemorrhage into the cerebral hemisphere, unspecified
I61.3	Intracerebral hemorrhage into the brainstem
I61.4	Intracerebral hemorrhage into the cerebellum
I61.5	Intracerebral intraventricular hemorrhage
I61.6	Intracerebral hemorrhage at multiple sites
I61.8	Other intracerebral hemorrhage
I61.9	Intracerebral hemorrhage, Unspecified
I62.00	Nontraumatic subdural hemorrhage: Acute
I62.01	Nontraumatic subdural hemorrhage: Subacute
I62.02	Nontraumatic subdural hemorrhage: Chronic
I62.09	Nontraumatic subdural hemorrhage: Unspecified
I62.1	Nontraumatic extradural hemorrhage
I62.9	Intracranial hemorrhage (nontraumatic), unspecified
I63.0	Cerebral infarction due to precerebral artery thrombosis
I63.1	Cerebral infarction due to precerebral artery embolism
I63.2	Cerebral infarction due to unspecified precerebral artery occlusion or stenosis
I63.3	Cerebral infarction due to cerebral artery thrombosis
I63.4	Cerebral infarction due to cerebral artery embolism
I63.5	Cerebral infarction due to unspecified cerebral artery occlusion or stenosis
I63.8	Other cerebral infarction
I63.9	Cerebral infarction, unspecified
I64	Stroke not specified as hemorrhage or infarction
I65.0	Vertebral artery occlusion and stenosis
I65.1	Occlusion and stenosis of the basilar artery
I65.2	Occlusion and stenosis of the carotid artery
I65.3	Occlusion and stenosis of multiple and bilateral precerebral arteries
I65.8	Occlusion and stenosis of other precerebral arteries
I66.0	Occlusion and stenosis of the middle cerebral artery
I66.2	Occlusion and stenosis of the posterior cerebral artery
I66.2	Occlusion and stenosis of the posterior cerebral artery
I66.2	Occlusion and stenosis of the posterior cerebral artery
I66.8	Occlusion and stenosis of other cerebral arteries
I66.9	Occlusion and stenosis of an unspecified cerebral artery
G45.02	Vertebral artery syndrome with basilar symptoms: Complete resolution within 1 to 24 hours
G45.03	Vertebral artery syndrome with basilar symptoms: Complete resolution within less than 1 hour
G45.12	Internal carotid artery syndrome (hemiplegic): Complete resolution within 1 to 24 hours
G45.13	Internal carotid artery syndrome (unilateral): Complete resolution within less than 1 hour
G45.13	Internal carotid artery syndrome (unilateral): Complete resolution within less than 1 hour
G45.13	Internal carotid artery syndrome (unilateral): Complete resolution within less than 1 hour
G45.13	Internal carotid artery syndrome (unilateral): Complete resolution within less than 1 hour
G45.42	Transient global amnesia [amnestic episode]: Complete resolution within 1 to 24 hours
G45.42	Transient global amnesia [amnestic episode]: Complete resolution within 1 to 24 hours
G45.82	Other cerebral transient ischemia and related syndromes: Complete resolution within 1 to 24 hours
G45.83	Other cerebral transient ischemia and related syndromes: Complete resolution within less than 1 hour
G45.89	Other cerebral transient ischemia and related syndromes: Course of recovery unspecified
G45.92	Cerebral transient ischemia, unspecified: Complete recovery within 1 to 24 hours
G45.93	Cerebral transient ischemia, unspecified: Complete recovery within less than 1 hour
G45.99	Cerebral transient ischemia, unspecified: Course of recovery unspecified
G45.99	Cerebral transient ischemia, unspecified: Course of recovery unspecified
G46.0	Middle cerebral artery syndrome
G46.1	Anterior cerebral artery syndrome
G46.2	Posterior cerebral artery syndrome
G46.3	Brainstem syndrome
G46.4	Cerebellar syndrome
G46.7	Other lacunar syndromes
G46.8	Other cerebral vascular syndromes in cerebrovascular disease
I67.10	Cerebral aneurysm (acquired)
I67.2	Cerebral atherosclerosis
I67.4	Hypertensive encephalopathy
I67.4	Hypertensive encephalopathy
I67.5	Moyamoya syndrome
I67.6	Non-purulent thrombosis of the intracranial venous system
I67.7	Cerebral arteritis, not elsewhere classified
I67.80	Vasospasm in subarachnoid hemorrhage
I67.88	Other specified cerebrovascular disorders
I67.9	Cerebrovascular disorder, unspecified
I69.0	Sequelae of subarachnoid hemorrhage
I69.1	Sequelae of intracerebral hemorrhage
I69.2	Sequelae of other non-traumatic intracranial hemorrhage
I69.3	Sequelae of cerebral infarction
I69.4	Sequelae of stroke, not specified as hemorrhage or infarction
I69.8	Sequelae of other and unspecified cerebrovascular disorders
Pulmonary disease
J40	Bronchitis not specified as acute or chronic
J41.0	Simple chronic bronchitis
J41.1	Mucous-purulent chronic bronchitis
J41.8	Mixed forms of simple and mucopurulent chronic bronchitis
J42	Unspecified chronic bronchitis
J43.0	McLeod's syndrome
J43.1	Panlobular emphysema
J43.2	Centrilobular emphysema
J43.8	Other emphysema
J43.9	Emphysema, unspecified
J44.00	Chronic obstructive pulmonary disease with acute lower respiratory tract infection: FEV1 <35% of predicted
J44.00	Chronic obstructive pulmonary disease with acute lower respiratory tract infection: FEV1 <35% of predicted
J44.01	Chronic obstructive pulmonary disease with acute lower respiratory tract infection: FEV1 >=35% and <50% of predicted
J44.02	Chronic obstructive pulmonary disease with acute lower respiratory tract infection: FEV1 >=50% and <70% of predicted Predicted value
J44.03	Chronic obstructive pulmonary disease with acute lower respiratory tract infection: FEV1 >=70% of predicted value
J44.09	Chronic obstructive pulmonary disease with acute lower respiratory tract infection: FEV1 unspecified
J44.10	Chronic obstructive pulmonary disease with acute exacerbation, unspecified: FEV1 <35% of predicted value
J44.11	Chronic obstructive pulmonary disease with acute exacerbation, unspecified: FEV1 >=35% and <50% of predicted value
J44.12	Chronic obstructive pulmonary disease with acute exacerbation, unspecified: FEV1 >=50% and <70% of predicted value
J44.13	Chronic obstructive pulmonary disease with acute exacerbation, unspecified: FEV1 >=70% of predicted value
J44.19	Chronic obstructive pulmonary disease with acute exacerbation, unspecified: FEV1 unspecified
J44.80	Other specified Chronic obstructive pulmonary disease: FEV1 <35% of predicted
J44.81	Other specified chronic obstructive pulmonary disease: FEV1 >=35% and <50% of predicted
J44.82	Other specified chronic obstructive pulmonary disease: FEV1 >=50% and <70% of predicted
J44.83	Other specified chronic obstructive pulmonary disease: FEV1 >=70% of predicted
J44.89	Other specified chronic obstructive pulmonary disease: FEV1 not otherwise specified
J44.90	Chronic obstructive pulmonary disease, unspecified: FEV1 <35% of predicted
J44.91	Chronic obstructive pulmonary disease, unspecified: FEV1 >=35% and <50% of predicted
J44.92	Chronic obstructive pulmonary disease, unspecified: FEV1 >=50% and <70% of predicted
J44.93	Chronic obstructive pulmonary disease, unspecified: FEV1 >=70% of predicted value
J44.99	Chronic obstructive pulmonary disease, unspecified: FEV1 unspecified
J45.00	Predominantly allergic asthma: Reported as well controlled and not severe
J45.01	Predominantly allergic asthma: Reported as partially controlled and not severe
J45.03	Predominantly allergic asthma: Reported as well controlled and severe
J45.04	Predominantly allergic asthma: Reported as partially controlled and severe
J45.09	Predominantly allergic asthma: No information on control status or severity
J45.10	Nonallergic asthma: Reported as well controlled and not severe
J45.11	Nonallergic asthma: Reported as partially controlled and not severe
J45.13	Nonallergic asthma: Reported as well controlled and severe
J45.15	Nonallergic asthma: Reported as uncontrolled and severe
J45.19	Nonallergic asthma: No information on control status or severity
J45.80	Mixed forms of asthma: Reported as well controlled and not severe
J45.81	Mixed forms Bronchial asthma: Described as partially controlled and not severe
J45.82	Mixed forms of bronchial asthma: Described as uncontrolled and not severe
J45.89	Mixed forms of bronchial asthma: No information on control status or severity
J45.90	Bronchial asthma, unspecified: Described as well controlled and not severe
J45.91	Bronchial asthma, unspecified: Described as partially controlled and not severe
J45.92	Bronchial asthma, unspecified: Described as uncontrolled and not severe
J45.93	Bronchial asthma, unspecified: Described as well controlled and severe
J45.94	Bronchial asthma, unspecified: Described as partially controlled and severe
J45.95	Bronchial asthma, unspecified: Described as uncontrolled and severe
J45.99	Bronchial asthma, unspecified: No information on control status or severity
J46	Status asthmaticus
J47	Bronchiectasis
J67.00	Farmer's lung: No information on acute exacerbation
J67.20	Aviculturalist's lung: No information on acute exacerbation
J67.90	Allergic Alveolitis due to unspecified organic dust: No acute exacerbation reported
J60	Coal miner's pneumoconiosis
J61.0	Pneumoconiosis due to asbestos and other inorganic fibers: No acute exacerbation reported
J62.8	Pneumoconiosis due to other silica dust
J64	Unspecified pneumoconiosis
Connective-tissue disorder
M32.1	Systemic lupus erythematosus with involvement of organs or organ systems
M32.8	Other forms of systemic lupus erythematosus
M32.9	Systemic lupus erythematosus, unspecified
M33.2	Polymyositis
M34.0	Progressive systemic sclerosis
M34.1	CR(E)ST syndrome
M34.8	Other forms of systemic sclerosis
M34.9	Systemic sclerosis, unspecified
M05.30	Seropositive chronic polyarthritis with involvement of other organs and organ systems: Multiple sites
M05.34	Seropositive chronic polyarthritis with involvement of other organs and organ systems: Hand [fingers, wrist, metacarpals, joints between these bones]
M05.39	Seropositive chronic polyarthritis with involvement of other organs and organ systems: Unspecified site
M05.80	Other seropositive chronic polyarthritis: Multiple sites
M05.89	Other seropositive chronic polyarthritis: Unspecified site
M06.00	Seronegative chronic polyarthritis: Multiple sites
M06.09	Seronegative chronic polyarthritis: None Specified location
M06.90	Chronic polyarthritis, unspecified: Multiple locations
M06.94	Chronic polyarthritis, unspecified: Hand [fingers, carpus, metacarpus, joints between these bones]
M06.94	Chronic polyarthritis, unspecified: Hand [fingers, carpus, metacarpus, joints between these bones]
M06.98	Chronic polyarthritis, unspecified: Other [neck, head, ribs, trunk, skull, spine]
M06.99	Chronic polyarthritis, unspecified: Unspecified location
M05.10	Pulmonary manifestation of seropositive chronic polyarthritis: Multiple locations
M05.19	Pulmonary manifestation of seropositive chronic polyarthritis: Unspecified location
M35.3	Polymyalgia rheumatica
Peptic ulcer
K25.0	Gastric ulcer: Acute, with bleeding
K25.1	Gastric ulcer: Acute, with perforation
K25.2	Gastric ulcer: Acute, with bleeding and perforation
K25.3	Gastric ulcer: Acute, without bleeding or perforation
K25.4	Gastric ulcer: Chronic or unspecified, with bleeding
K25.5	Gastric ulcer: Chronic or unspecified, with perforation
K25.7	Gastric ulcer: Chronic, without bleeding or perforation
K25.9	Gastric ulcer: Neither described as acute nor chronic, without bleeding or perforation
K26.0	Duodenal ulcer: Acute, with bleeding
K26.1	Duodenal ulcer: Acute, with perforation
K26.2	Duodenal ulcer: Acute, with bleeding and perforation
K26.3	Duodenal ulcer: Acute, without bleeding or perforation
K26.4	Duodenal ulcer: Chronic or unspecified, with bleeding
K26.5	Ulcer Duodenal ulcer: Chronic or unspecified, with perforation
K26.7	Duodenal ulcer: Chronic, without bleeding or perforation
K26.9	Duodenal ulcer: Neither described as acute nor chronic, without bleeding or perforation
K28.0	Jejunal peptic ulcer: Acute, with bleeding
K28.0	Jejunal peptic ulcer: Acute, with bleeding
K28.0	Jejunal peptic ulcer: Acute, with bleeding
K28.1	Jejunal peptic ulcer: Acute, with perforation
K28.3	Jejunal peptic ulcer: Acute, without bleeding or perforation
K28.3	Jejunal peptic ulcer: Acute, without bleeding or perforation
K28.4	Jejunal peptic ulcer: Chronic or unspecified, with bleeding
K28.4	Jejunal peptic ulcer: Chronic or unspecified, with bleeding
K28.4	Jejunal peptic ulcer: Chronic or unspecified, with bleeding
K28.9	Peptic ulcer jejuni: Neither acute nor chronic, without bleeding or perforation
Mild liver disease
K70.2	Alkoholische Fibrose und Sklerose der Leber
K70.3	Alkoholische Leberzirrhose
K73.8	Sonstige chronische Hepatitis, anderenorts nicht klassifiziert
K73.8	Sonstige chronische Hepatitis, anderenorts nicht klassifiziert
K73.9	Chronische Hepatitis, nicht näher bezeichnet
K71.7	Toxische Leberkrankheit mit Fibrose und Zirrhose der Leber
K74.0	Leberfibrose
K74.2	Leberfibrose mit Lebersklerose
K74.3	Primäre biliäre Cholangitis
K74.4	Sekundäre biliäre Zirrhose
K74.5	Biliäre Zirrhose, nicht näher bezeichnet
Diabetes
E10.90	Type 1 diabetes mellitus: Without complications: Not described as derailed
E10.91	Type 1 diabetes mellitus: Without complications: Described as derailed
E11.01	Type 2 diabetes mellitus: With coma: Described as derailed
E11.11	Type 2 diabetes mellitus: With ketoacidosis: Described as derailed
E11.90	Type 2 diabetes mellitus: Without complications: Not described as derailed
E11.91	Type 2 diabetes mellitus: Without complications: Described as derailed
E13.90	Other specified diabetes mellitus: Without complications: Not described as derailed
E13.91	Other specified diabetes mellitus: Without complications: Described as derailed
E14.90	Unspecified diabetes mellitus: Without complications: Not described as derailed
E14.91	Unspecified diabetes mellitus: Without complications: Described as derailed
E13.11	Other specified diabetes mellitus: With ketoacidosis: Described as derailed
E13.41	Other Specified diabetes mellitus: With neurological complications: Designated as decompensated
E10.50	Type 1 diabetes mellitus: With peripheral vascular complications: Not designated as decompensated
E10.51	Type 1 diabetes mellitus: With peripheral vascular complications: Designated as decompensated
E11.50	Type 2 diabetes mellitus: With peripheral vascular complications: Not designated as decompensated
E11.51	Type 2 diabetes mellitus: With peripheral vascular complications: Designated as decompensated
E13.50	Other specified diabetes mellitus: With peripheral vascular complications: Not designated as decompensated
E13.51	Other specified diabetes mellitus: With peripheral vascular complications: Designated as decompensated
Diabetes complications
E10.20	Type 1 diabetes mellitus: With kidney complications: Not designated as derailed
E10.21	Type 1 diabetes mellitus: With kidney complications: Designated as derailed
E11.20	Type 2 diabetes mellitus: With kidney complications: Not designated as derailed
E11.21	Type 2 diabetes mellitus: With kidney complications: Designated as derailed
E13.20	Other specified diabetes mellitus: With kidney complications: Not designated as derailed
E13.21	Other specified diabetes mellitus: With kidney complications: Designated as derailed
E10.30	Type 1 diabetes mellitus: With eye complications: Not designated as derailed
E11.30	Type 2 diabetes mellitus: With eye complications: Not designated as derailed
E11.31	Type 2 diabetes mellitus: With eye complications: Designated as derailed
E11.40	Type 2 diabetes mellitus: With neurological complications: Not designated as Described as derailed
E11.41	Type 2 diabetes mellitus: With neurological complications: Described as derailed
E13.40	Other specified diabetes mellitus: With neurological complications: Not described as derailed
E13.41	Other specified diabetes mellitus: With neurological complications: Described as derailed
Paraplegia
G81.0	Flaccid hemiparesis and hemiplegia
G81.1	Spastic hemiparesis and hemiplegia
G81.9	Hemiparesis and hemiplegia, unspecified
G82.00	Fluctual paraparesis and paraplegia: Acute complete paraplegia of non-traumatic origin
G82.01	Fluctual paraparesis and paraplegia: Acute incomplete paraplegia of non-traumatic origin
G82.02	Fluctual paraparesis and paraplegia: Chronic complete paraplegia
G82.03	Fluctual paraparesis and paraplegia: Chronic incomplete paraplegia
G82.09	Fluctual paraparesis and paraplegia: Unspecified
G82.11	Spastic paraparesis and paraplegia: Acute incomplete paraplegia of non-traumatic origin
G82.12	Spastic paraparesis and paraplegia: Chronic complete paraplegia
G82.13	Spastic paraparesis and paraplegia: Chronic incomplete paraplegia
G82.19	Spastic paraparesis and paraplegia: Unspecified
G82.20	Paraparesis and paraplegia, unspecified: Acute complete paraplegia of non-traumatic origin
G82.21	Paraparesis and paraplegia, unspecified: Acute incomplete paraplegia of non-traumatic origin
G82.22	Paraparesis and paraplegia, unspecified: Chronic complete paraplegia
G82.23	Paraparesis and paraplegia, unspecified: Chronic incomplete paraplegia
G82.23	Paraparesis and paraplegia, unspecified: Chronic incomplete paraplegia
G82.29	Paraparesis and paraplegia, unspecified: Unspecified
G82.29	Paraparesis and paraplegia, unspecified: Unspecified
G82.30	Fluctuating tetraparesis and tetraplegia: Acute complete paraplegia of non-traumatic origin
G82.31	Fluctuating tetraparesis and tetraplegia: Acute incomplete paraplegia of non-traumatic origin
G82.32	Fluctuating tetraparesis and tetraplegia: Chronic complete paraplegia
G82.33	Fluctuating tetraparesis and tetraplegia: Chronic incomplete paraplegia
G82.39	Fluctuating tetraparesis and tetraplegia: Not specified Further specified
G82.41	Spastic tetraparesis and tetraplegia: Acute incomplete paraplegia of non-traumatic origin
G82.42	Spastic tetraparesis and tetraplegia: Chronic complete paraplegia
G82.42	Spastic tetraparesis and tetraplegia: Chronic complete paraplegia
G82.43	Spastic tetraparesis and tetraplegia: Chronic incomplete paraplegia
G82.49	Spastic tetraparesis and tetraplegia: Unspecified
G82.51	Tetraparesis and tetraplegia, unspecified: Acute incomplete paraplegia of non-traumatic origin
G82.53	Tetraparesis and tetraplegia, unspecified: Chronic incomplete paraplegia
Renal disease
N03.1	Chronic Nephritic Syndrome: Focal and Segmental Glomerular Lesions
N03.2	Chronic Nephritic Syndrome: Diffuse Membranous Glomerulonephritis
N03.8	Chronic Nephritic Syndrome: Other Morphological Changes
N03.9	Chronic Nephritic Syndrome: Type of Morphological Change Unspecified
N03.9	Chronic Nephritic Syndrome: Type of Morphological Change Unspecified
N03.9	Chronic Nephritic Syndrome: Type of Morphological Change Unspecified
N03.1	Chronic Nephritic Syndrome: Focal and Segmental Glomerular Lesions
N03.2	Chronic Nephritic Syndrome: Diffuse Membranous Glomerulonephritis
N03.8	Chronic Nephritic Syndrome: Other Morphological Changes
N03.9	Chronic Nephritic Syndrome: Type of Morphological Change Unspecified
N18.1	Chronic kidney disease, stage 1
N18.2	Chronic kidney disease, stage 2
N18.3	Chronic kidney disease, stage 3
N18.4	Chronic kidney disease, stage 4
N18.5	Chronic kidney disease, stage 5
N18.80	Unilateral chronic renal dysfunction
N18.80	Unilateral chronic renal dysfunction
N18.80	Unilateral chronic renal dysfunction
N18.80	Unilateral chronic renal dysfunction
N18.80	Unilateral chronic renal dysfunction
N18.80	Unilateral chronic renal dysfunction
N18.89	Other chronic kidney disease, stage unspecified
N18.9	Chronic kidney disease, unspecified
N19	Unspecified renal failure
N25.0	Renal osteodystrophy
N25.8	Other diseases resulting from damage to renal tubular function
Haematological neoplasms
C81.0	Nodular lymphocyte-predominant Hodgkin lymphoma
C81.1	Nodular sclerosing (classic) Hodgkin lymphoma
C81.1	Nodular sclerosing (classic) Hodgkin lymphoma
C81.2	Mixed cell (classic) Hodgkin lymphoma
C81.7	Other types of (classic) Hodgkin lymphoma
C81.9	Hodgkin lymphoma, unspecified
C82.0	Follicular lymphoma grade I
C82.1	Follicular lymphoma grade II
C82.3	Follicular lymphoma grade IIIa
C82.4	Follicular lymphoma grade IIIb
C82.7	Other types of follicular lymphoma
C82.9	Follicular lymphoma, unspecified
C83.0	Small B-cell lymphoma
C83.1	Mantle cell lymphoma
C83.3	Diffuse large B-cell lymphoma
C83.5	Lymphoblastic Lymphoma
C83.7	Burkitt's lymphoma
C83.8	Other non-follicular lymphomas
C83.9	Non-follicular lymphoma, unspecified
C83.9	Non-follicular lymphoma, unspecified
C84.0	Mycosis fungoides
C84.1	Sézary syndrome
C84.4	Peripheral T-cell lymphoma, unspecified
C84.4	Peripheral T-cell lymphoma, unspecified
C84.4	Peripheral T-cell lymphoma, unspecified
C84.6	Anaplastic large cell lymphoma, ALK-positive
C84.7	Anaplastic large cell lymphoma, ALK-negative
C85.1	B-cell lymphoma, unspecified
C85.2	Mediastinal (thymic) large B-cell lymphoma
C85.7	Other specified types of non-Hodgkin's lymphoma
C85.9	Non-Hodgkin's lymphoma, unspecified
C85.9	Non-Hodgkin's lymphoma, unspecified designated
C90.00	Multiple myeloma: No indication of complete remission
C90.01	Multiple myeloma: In complete remission
C91.00	Acute lymphocytic leukemia [ALL]: No indication of complete remission
C91.00	Acute lymphocytic leukemia [ALL]: No indication of complete remission
C91.00	Acute lymphocytic leukemia [ALL]: No indication of complete remission
C91.10	Chronic B-cell lymphocytic leukemia [CLL]: No indication of complete remission
C91.11	Chronic B-cell lymphocytic leukemia [CLL]: In complete remission
C91.40	Hairy cell leukemia: No indication of complete remission
C91.40	Hairy cell leukemia: No indication of complete remission
C91.60	T-cell prolymphocytic leukemia: No indication of complete remission
C92.00	Acute myeloblastic leukemia [AML]: No indication of complete remission
C92.01	Acute myeloblastic leukemia [AML]: In complete remission
C92.10	Chronic Myeloid leukemia [CML], BCR/ABL-positive: No complete remission specified
C92.11	Chronic myeloid leukemia [CML], BCR/ABL-positive: In complete remission
C92.40	Acute promyelocytic leukemia [PCL]: No complete remission specified
C92.50	Acute myelomonocytic leukemia: No complete remission specified
C92.50	Acute myelomonocytic leukemia: No complete remission specified
C92.80	Acute myeloid leukemia with multilineage dysplasia: No complete remission specified
C92.90	Myeloid leukemia, unspecified: No complete remission specified
C93.10	Chronic myelomonocytic leukemia: No complete remission specified
C93.10	Chronic myelomonocytic leukemia: No complete remission specified
Severe liver disease
K72.9	Liver failure, unspecified
K76.6	Portal hypertension
K76.7	Hepatorenal syndrome
K72.10	Acute-on-chronic liver failure, not elsewhere classified
K72.18	Other and unspecified chronic liver failure, not elsewhere classified
HIV
B20	Infectious and parasitic diseases due to HIV disease [Human Immunodeficiency Virus Disease]
B21	Malignant neoplasms due to HIV disease [Human Immunodeficiency Virus Disease]
B22	Other specified diseases due to HIV disease [Human Immunodeficiency Virus Disease]
B23.8	Other specified conditions due to HIV disease
B24	Unspecified HIV disease [Human Immunodeficiency Virus Disease]
Dementia
F00.0	Demenz bei Alzheimer-Krankheit, mit frühem Beginn (Typ 2)
F00.1	Demenz bei Alzheimer-Krankheit, mit spätem Beginn (Typ 1)
F00.2	Demenz bei Alzheimer-Krankheit, atypische oder gemischte Form
F00.9	Demenz bei Alzheimer-Krankheit, nicht näher bezeichnet
F01.0	Vaskuläre Demenz mit akutem Beginn
F01.1	Multiinfarkt-Demenz
F01.2	Subkortikale vaskuläre Demenz
F01.3	Gemischte kortikale und subkortikale vaskuläre Demenz
F01.8	Sonstige vaskuläre Demenz
F01.9	Vaskuläre Demenz, nicht näher bezeichnet
F02.3	Demenz bei primärem Parkinson-Syndrom
F02.8	Demenz bei anderenorts klassifizierten Krankheitsbildern
F03	Nicht näher bezeichnete Demenz
F05.1	Delir bei Demenz
