# Supplementary material
Source: Research Square preprint supplement (doi:10.21203/rs.3.rs-8610908/v1)
Supplement: Supplementary file 4 [file 5cb354511f7887f3a59171de.xlsx]

## Sheet: SPC - Mets
			oral cavity / throat			stomach			intestine / rectum			pancreas			lung			malignant melanoma			breast			cervix			uterus (without cervix)			ovary			prostate			kidney			bladder
			C00 - 14			C16			C18 - 20			C25			C34			C43			C50			C53			C54 - 55			C56			C61			C64			C67
			all hospital cases	specialized palliative care	%	all hospital cases	specialized palliative care	%	all hospital cases	specialized palliative care	%	all hospital cases	specialized palliative care	%	all hospital cases	specialized palliative care	%	all hospital cases	specialized palliative care	%	all hospital cases	specialized palliative care	%	all hospital cases	specialized palliative care	%	all hospital cases	specialized palliative care	%	all hospital cases	specialized palliative care	%	all hospital cases	specialized palliative care	%	all hospital cases	specialized palliative care	%	all hospital cases	specialized palliative care	%
		total number of hospital cases	64973	2786	0.0428793	55714	3800	0.0682055	181464	8824	0.0486267	77490	7831	0.101058	254444	19845	0.0779936	44705	1628	0.0364165	207681	9307	0.0448139	18215	1118	0.061378	27961	1401	0.0501055	35523	3232	0.0909833	158001	5658	0.0358099	37420	2069	0.0552913	129135	2883	0.0223255
ICD-10 -GM code	Secondary malignant neoplasm of	ICD-10 -GM code	case number	case number	%	case number	case number	%	case number	case number	%	case number	case number	%	case number	case number	%	case number	case number	%	case number	case number	%	case number	case number	%	case number	case number	%	case number	case number	%	case number	case number	%	case number	case number	%	case number	case number	%
C77.0	Lymph nodes of the head, face, and neck	C77.0	15649	599	0.0382772	285	35	0.122807	313	37	0.118211	166	17	0.10241	4225	475	0.112426	1053	49	0.0465337	964	112	0.116183	100	10	0.1	87	17	0.195402	129	24	0.186047	625	45	0.072	138	25	0.181159	156	25	0.160256
C77.1	Intrathoracic lymph nodes	C77.1	1027	106	0.103213	1526	127	0.0832241	2043	218	0.106706	775	96	0.123871	64653	5710	0.0883176	630	74	0.11746	2810	428	0.152313	225	41	0.182222	241	34	0.141079	376	53	0.140957	1712	151	0.0882009	1073	152	0.141659	694	82	0.118156
C77.2	Intraabdominal lymph nodes	C77.2	193	25	0.129534	7799	554	0.0710347	23698	1171	0.0494135	10706	859	0.0802354	3815	612	0.160419	523	69	0.131931	1101	175	0.158946	1007	103	0.102284	1144	111	0.097028	2095	251	0.119809	4154	408	0.0982186	1585	194	0.122397	2444	249	0.101882
C77.3	Axillary lymph nodes and upper extremity lymph nodes	C77.3	129	23	0.178295	89	16	0.179775	190	24	0.126316	61	6	0.0983607	1382	178	0.128799	2590	103	0.0397683	26552	981	0.0369464	42	0	0	79	6	0.0759494	213	33	0.15493	179	16	0.0893855	74	0	0	64	12	0.1875
C77.4	Inguinal lymph nodes and lower extremity lymph nodes	C77.4	27	0	0	25	0	0	684	59	0.0862573	43	0	0	273	49	0.179487	2083	93	0.0446471	147	19	0.129252	268	28	0.104478	180	20	0.111111	264	19	0.0719697	888	97	0.109234	38	0	0	524	49	0.0935115
C77.5	Intrapelvic lymph nodes	C77.5	25	0	0	93	0	0	3852	150	0.0389408	91	16	0.175824	237	35	0.147679	310	21	0.0677419	127	20	0.15748	1983	74	0.0373172	1330	57	0.0428571	844	72	0.0853081	6209	301	0.048478	172	17	0.0988372	3545	175	0.0493653
C77.8	Lymph nodes of multiple regions	C77.8	529	108	0.204159	997	148	0.148445	1941	300	0.15456	866	114	0.13164	6681	944	0.141296	700	151	0.215714	1493	368	0.246484	503	67	0.133201	398	66	0.165829	556	118	0.21223	3360	309	0.0919643	484	108	0.22314	1184	163	0.137669
C77.9	Lymph nodes, unspecified	C77.9	232	28	0.12069	362	47	0.129834	1008	127	0.125992	674	96	0.142433	1675	305	0.18209	324	38	0.117284	1025	152	0.148293	141	29	0.205674	134	26	0.19403	233	39	0.167382	1519	167	0.109941	266	56	0.210526	648	64	0.0987654
C78.0	lung	C78.0	3958	510	0.128853	2456	379	0.154316	22970	2577	0.11219	7633	1303	0.170706	24668	3428	0.138965	3895	598	0.15353	11356	2125	0.187126	1130	232	0.20531	2429	336	0.138329	1456	299	0.205357	4628	700	0.151253	6174	866	0.140266	3890	498	0.128021
C78.1	mediastinum	C78.1	66	9	0.136364	52	0	0	119	21	0.176471	36	0	0	924	123	0.133117	80	17	0.2125	266	51	0.191729	26	6	0.230769	27	0	0	55	0	0	58	0	0	83	7	0.0843373	39	5	0.128205
C78.2	pleura	C78.2	588	105	0.178571	1204	247	0.20515	1587	260	0.163831	1253	265	0.211492	21597	3092	0.143168	448	93	0.207589	8278	1408	0.170089	206	55	0.26699	466	104	0.223176	3020	523	0.173179	846	152	0.179669	897	167	0.186176	417	83	0.199041
C78.3	other and unspecified Respiratory Organs	C78.3	21	0	0	19	0	0	49	0	0	14	0	0	110	18	0.163636	40	0	0	28	7	0.25	11	0	0	10	0	0	61	0	0	15	0	0	35	0	0	0	0
C78.4	Small Intestine	C78.4	5	0	0	84	8	0.0952381	582	46	0.0790378	154	26	0.168831	307	49	0.159609	260	32	0.123077	146	28	0.191781	31	0	0	95	7	0.0736842	346	34	0.0982659	31	0	0	73	11	0.150685	86	0	0
C78.5	Colon and Rectum	C78.5	12	0	0	265	29	0.109434	496	50	0.100806	207	24	0.115942	310	39	0.125806	116	19	0.163793	277	30	0.108303	108	16	0.148148	216	22	0.101852	816	71	0.0870098	123	5	0.0406504	52	0	0	139	18	0.129496
C78.6	Retroperitoneum and Peritoneum	C78.6	138	22	0.15942	9760	1453	0.148873	17995	2422	0.134593	9988	2054	0.205647	3160	782	0.247468	642	152	0.23676	4215	950	0.225386	1110	227	0.204505	2565	429	0.167251	14522	2052	0.141303	1097	181	0.164995	831	148	0.178099	1697	334	0.196818
C78.7	Liver and Intrahepatic Bile Ducts	C78.7	1398	209	0.149499	8115	1026	0.126433	47058	4295	0.0912703	26527	3762	0.141818	28762	4673	0.162471	2635	462	0.175332	15733	3031	0.192652	922	204	0.221258	1285	238	0.185214	3231	666	0.206128	5188	941	0.18138	2326	449	0.193035	3245	486	0.149769
C78.8	Secondary Malignant Neoplasm of Other Unspecified Digestive Organs	C78.8	182	22	0.120879	446	73	0.163677	906	113	0.124724	611	95	0.155483	2441	446	0.182712	621	131	0.21095	837	164	0.195938	70	16	0.228571	81	14	0.17284	542	71	0.130996	155	27	0.174194	636	74	0.116352	108	21	0.194444
C79.0	Kidney and Renal Pelvis	C79.0	82	19	0.231707	39	11	0.282051	248	37	0.149194	140	35	0.25	2090	390	0.186603	154	26	0.168831	192	43	0.223958	42	21	0.5	32	5	0.15625	42	5	0.119048	87	19	0.218391	140	13	0.0928571	105	19	0.180952
C79.1	Bladder and Other Unspecified Urinary Organs	C79.1	0	0		52	0	0	356	33	0.0926966	21	0	0	78	26	0.333333	47	12	0.255319	124	21	0.169355	117	17	0.145299	85	12	0.141176	107	21	0.196262	287	30	0.10453	31	0	0	116	14	0.12069
C79.2	Skin	C79.2	314	67	0.213376	278	59	0.21223	1141	147	0.128834	245	57	0.232653	1495	309	0.206689	2877	174	0.0604797	2320	512	0.22069	88	23	0.261364	199	26	0.130653	390	73	0.187179	141	26	0.184397	226	44	0.19469	201	34	0.169154
C79.3	Brain and Meninges	C79.3	579	111	0.19171	868	202	0.232719	2883	524	0.181755	406	92	0.226601	40662	6744	0.165855	4527	771	0.170311	8163	1786	0.218792	238	63	0.264706	465	95	0.204301	496	110	0.221774	1364	302	0.221408	1602	262	0.163546	670	129	0.192537
C79.4	Secondary Malignant Neoplasm of Other Unspecified Parts of the Nervous System	C79.4	31	5	0.16129	54	21	0.388889	110	26	0.236364	48	0	0	920	216	0.234783	138	27	0.195652	357	75	0.210084	0	0		20	0	0	16	0	0	353	61	0.172805	99	19	0.191919	43	6	0.139535
C79.5	Bone and Bone Marrow	C79.5	1955	376	0.192327	2814	546	0.19403	6628	1255	0.189348	3019	636	0.210666	41098	7545	0.183586	2119	436	0.205757	28956	5357	0.185005	804	180	0.223881	1185	239	0.201688	646	170	0.263158	33032	4004	0.121216	5313	978	0.184077	4858	815	0.167765
C79.6	Ovary	C79.6	0	0		403	64	0.158809	844	70	0.0829384	90	22	0.244444	66	5	0.0757576	5	0	0	258	29	0.112403	69	0	0	163	5	0.0306748	74	0	0	0	0		18	0	0	11	0	0
C79.7	Adrenal gland	C79.7	142	32	0.225352	615	105	0.170732	1375	214	0.155636	603	108	0.179104	16927	2701	0.159568	575	130	0.226087	733	184	0.251023	49	7	0.142857	99	20	0.20202	117	38	0.324786	468	74	0.15812	925	153	0.165405	337	59	0.175074
C79.81	breast	C79.81	0	0		28	0	0	15	0	0	20	0	0	183	36	0.196721	40	0	0	369	22	0.0596206	0	0		6	0	0	37	0	0	0	0		25	0	0	9	0	0
C79.82	genital organs	C79.82	5	0	0	45	5	0.111111	383	43	0.112272	14	0	0	62	10	0.16129	27	0	0	149	22	0.147651	126	7	0.0555556	305	24	0.0786885	181	16	0.0883978	365	18	0.0493151	34	0	0	150	22	0.146667
C79.83	pericardium	C79.83	19	0	0	38	11	0.289474	29	0	0	12	0	0	1056	183	0.173295	20	5	0.25	187	33	0.176471	0	0		0	0		21	8	0.380952	11	0	0	23	6	0.26087	5	0	0
C79.84	Other heart	C79.84	16	5	0.3125	0	0		13	0	0	13	0	0	105	32	0.304762	26	0	0	16	0	0	0	0		16	0	0	0	0		0	0		19	0	0	0	0
C79.85	connective tissue and other soft tissues of the neck	C79.85	304	25	0.0822368	8	0	0	11	0	0	0	0		130	25	0.192308	41	5	0.121951	78	0	0	0	0		0	0		0	0		32	5	0.15625	19	0	0	0	0
C79.86	connective tissue and other soft tissues of the extremities	C79.86	15	11	0.733333	22	0	0	65	16	0.246154	8	0	0	381	74	0.194226	189	21	0.111111	67	12	0.179104	0	0		20	5	0.25	18	0	0	45	0	0	75	8	0.106667	36	13	0.361111
C79.88	Secondary malignant neoplasm of other specified sites	C79.88	932	105	0.112661	776	83	0.106959	2933	297	0.101262	814	112	0.137592	5962	1062	0.178128	1032	163	0.157946	3207	353	0.110072	387	60	0.155039	645	67	0.103876	1029	105	0.102041	955	117	0.122513	807	115	0.142503	987	118	0.119554
C79.9	Secondary malignant neoplasm of unspecified site	C79.9	48	0	0	55	8	0.145455	204	21	0.102941	111	22	0.198198	368	52	0.141304	171	16	0.0935673	254	28	0.110236	0	0		34	7	0.205882	62	7	0.112903	202	20	0.0990099	93	6	0.0645161	71	7	0.0985915
frequency of specialized in-patient palliative care
	≤12,5%
	12,5 %- 15,9%
	16% - 19,5%
	≥20%
