# Supplementary material
Source: Research Square preprint supplement (doi:10.21203/rs.3.rs-8610908/v1)
Supplement: Supplementary file 5 [file 91f009670760b48fda46ac49.xlsx]

## Sheet: CCI
		oral cavity / throat				stomach				intestine / rectum				pancreas				lung				malignant melanoma				breast				cervix				uterus (without cervix)				ovar				prostate				kidney
		all hospital cases		specialized palliative care		all hospital cases		specialized palliative care		all hospital cases		specialized palliative care		all hospital cases		specialized palliative care		all hospital cases		specialized palliative care		all hospital cases		specialized palliative care		all hospital cases		specialized palliative care		all hospital cases		specialized palliative care		all hospital cases		specialized palliative care		all hospital cases		specialized palliative care		all hospital cases		specialized palliative care		all hospital cases		specialized palliative care
		all hospital cases	fatal cases	all hospital cases	fatal cases	all hospital cases	fatal cases	all hospital cases	fatal cases	all hospital cases	fatal cases	all hospital cases	fatal cases	all hospital cases	fatal cases	all hospital cases	fatal cases	all hospital cases	fatal cases	all hospital cases	fatal cases	all hospital cases	fatal cases	all hospital cases	fatal cases	all hospital cases	fatal cases	all hospital cases	fatal cases	all hospital cases	fatal cases	all hospital cases	fatal cases	all hospital cases	fatal cases	all hospital cases	fatal cases	all hospital cases	fatal cases	all hospital cases	fatal cases	all hospital cases	fatal cases	all hospital cases	fatal cases	all hospital cases	fatal cases	all hospital cases	fatal cases
total number of hospital cases		64973	3045	2786	900	55714	4304	3800	1655	181464	10595	8824	2968	77490	8264	7831	3006	254444	23715	19845	7065	44705	1591	1628	613	207681	8134	9307	2917	18215	727	1118	295	27961	1261	1401	472	35523	2243	3232	953	158001	545	5658	1855	37420	2139	2069	696
comorbidity	defining ICD-10-GM codes
acute myocardial infarction	I21, I22, I25.2	1732	85	58	15	1552	117	80	22	4987	446	161	41	1698	105	158	28	8760	1036	755	238	838	54	33	11	2485	152	127	31	152	0	0	0	368	36	21	0	388	24	30	0	6322	461	235	78	1308	86	61	58
congestive heart failure	I50	2924	374	172	71	5173	803	400	136	18480	2695	1088	427	5872	510	850	124	26919	4867	3064	1088	2185	316	178	71	14991	1854	1201	379	642	58	58	5	1910	242	141	48	2194	333	244	77	18151	2524	1152	394	4244	605	354	455
peripheral vascular disease	I70, I71, I73	2439	149	140	30	1523	139	91	5	4884	388	204	30	1660	88	154	0	14977	1553	1272	431	547	7	15	0	2201	136	90	7	151	0	0	0	210	5	5	0	290	0	24	0	4818	327	215	43	1104	70	56	58
cerebral vascular accidents (except hemiplegia)	I60 - I66, I67.0 - .2, I67.4 - 9, I68.1 - 2, I68.8, I69, G45.0 - 2, G45.8 - 9, G46	2167	166	113	33	1483	194	111	10	5156	564	295	97	2501	329	379	74	11622	1981	1287	459	1147	143	73	16	5234	432	202	74	242	0	17	0	593	40	9	0	545	39	44	8	6261	551	265	61	1315	109	63	80
pulmonary disease	J40 - J47, J60 - J67	6148	332	303	64	4029	301	205	58	12023	893	460	114	4656	127	457	44	76583	6791	6129	1851	1629	63	49	5	11894	495	516	106	608	21	34	5	1257	38	27	6	1444	89	110	26	10384	624	377	79	2885	145	104	104
peptic ulcer	K25 - K28	694	36	48	0	2116	196	99	26	2536	294	97	34	2075	102	183	3	2125	399	274	85	173	21	0	0	1116	133	89	72	57	0	0	0	85	5	5	0	231	35	20	0	1089	147	58	10	300	26	10	21
mild liver disease	K70.2 - 3, K73, K71.7, K74.0, K74.2 - 5	754	78	59	25	292	28	13	0	1062	139	66	32	399	37	36	5	996	165	96	31	43	5	0	0	481	48	27	18	19	0	0	0	28	0	0	0	67	5	0	0	371	47	18	5	108	7	0	0
severe liver disease	K72.9, K66.6, K66.7, K72.1	114	22	0	0	226	90	53	38	863	358	199	145	741	43	187	7	393	204	112	66	51	9	0	0	566	292	181	115	0	0	0	0	19	10	0	0	53	22	11	0	208	73	49	30	65	24	0	18
dementia	F00 - F03, F05.1	762	68	62	20	943	133	89	22	4499	614	298	89	1150	72	137	12	3391	616	461	143	721	39	33	6	3859	308	229	61	128	5	7	0	549	44	25	8	370	39	34	14	4730	574	340	133	670	70	57	51
paraplegia	G81, G04.1, G82.0 - 2	709	82	76	32	607	119	70	26	2840	387	288	102	1107	174	198	45	6694	1285	1331	407	880	156	204	77	2949	337	397	91	185	6	19	0	427	35	28	5	286	36	48	8	3353	426	426	97	945	101	136	69
diabetes	E10.9, E11.9, E13.9, E14.9, E10.1, E11.1, E13.1, E14.1, E10.5, E11.5, E13.5, E14.5	7558	337	342	107	8944	713	506	186	29153	1705	1264	403	24098	847	2380	287	40161	3845	3464	1018	5218	250	241	87	19959	977	1054	310	1367	81	86	28	4931	245	252	72	3194	238	320	97	24161	1196	945	279	7145	386	402	294
diabetes complications	E10.2, E11.2, E13.2, E14.2, E10.3, E11.3, E13.3, E14.3, E10.4, E11.4, E13.4, E14.4	474	36	12	0	858	81	65	13	3058	288	141	64	1588	69	185	14	3619	446	307	113	351	19	10	0	1807	117	115	30	104	0	6	0	401	26	11	0	295	33	20	7	2677	184	113	32	835	62	37	45
renal disease	N03, N05.2 - 6, N07.2 - 4, N01, N18, N19, N25	3970	323	258	93	5316	655	437	178	20856	2000	1278	462	6676	375	932	128	24613	3214	2599	907	2608	251	175	67	14484	1316	1188	400	1540	128	171	46	2393	215	213	72	3077	369	412	144	20373	1739	1085	373	8129	702	617	545
connective-tissue disorder	M32, M33.2, M34, M05.3, M05.8	289	6	0	0	309	25	6	0	1120	68	55	10	478	28	60	0	2576	185	174	49	311	0	0	0	1360	48	70	8	54	0	0	0	134	0	0	0	245	5	32	0	894	31	12	0	262	0	10	0
HIV	B20 - 24	51	0	0	0	0	0	0	0	32	0	0	0	34	0	0	0	152	13	12	0	0	0	0	0	0	0	0	0	27	0	0	0	0	0	0	0	0	0	0	0	23	0	0	0	0	0	0	0
haematological neoplasms	C80 - C86, C88.3, C88.7, C88.9, C90.0, C90.1, C91 - C94.3, C94.51, C94.7, C95 - 96	325	5	0	0	309	0	0	0	1056	69	22	0	231	5	13	0	1339	112	94	27	331	12	0	0	1194	63	44	46	0	0	0	0	79	0	0	0	127	6	6	0	1596	96	50	11	424	6	0	6
metastastic cancer	C77 - 79	28621	2143	2522	900	39672	4824	5257	2070	142729	12482	14553	4881	65369	2542	9817	1093	276803	32284	40368	13089	28938	3291	3888	1522	120785	13285	18526	6041	9803	881	1486	420	14041	1616	1992	693	31995	3088	4878	1516	68129	6841	8176	2620	24386	3100	3878	2184
Dementia	F00 - F03, F05.1	762	68	62	20	943	133	89	22	4499	614	298	89	1150	72	137	12	3391	616	461	143	721	39	33	6	3859	308	229	61	128	5	7	0	549	44	25	8	370	39	34	14	4730	574	340	133	670	70	57	51
Acute myocardial infarction	I21, I22, I25.2	1732	85	58	15	1552	117	80	22	4987	446	161	41	1698	105	158	28	8760	1036	755	238	838	54	33	11	2485	152	127	31	152	0	0	0	368	36	21	0	388	24	30	0	6322	461	235	78	1308	86	61	58
Congestive heart failure	I50	2924	374	172	71	5173	803	400	136	18480	2695	1088	427	5872	510	850	124	26919	4867	3064	1088	2185	316	178	71	14991	1854	1201	379	642	58	58	5	1910	242	141	48	2194	333	244	77	18151	2524	1152	394	4244	605	354	455
Peripheral vascular disease	I70, I71, I73	2439	149	140	30	1523	139	91	5	4884	388	204	30	1660	88	154	0	14977	1553	1272	431	547	7	15	0	2201	136	90	7	151	0	0	0	210	5	5	0	290	0	24	0	4818	327	215	43	1104	70	56	58
Cerebral vascular accidents (except hemiplegia)	I60 - I66, I67.0 - .2, I67.4 - .9, I68.1 - 2, I68.8, I69, G45.0 - .2, G45.8 - .9, G46	2167	166	113	33	1483	194	111	10	5156	564	295	97	2501	329	379	74	11622	1981	1287	459	1147	143	73	16	5234	432	202	74	242	0	17	0	593	40	9	0	545	39	44	8	6261	551	265	61	1315	109	63	80
Pulmonary disease	J40 - J47, J60 - J67	6148	332	303	64	4029	301	205	58	12023	893	460	114	4656	127	457	44	76583	6791	6129	1851	1629	63	49	5	11894	495	516	106	608	21	34	5	1257	38	27	6	1444	89	110	26	10384	624	377	79	2885	145	104	104
Connective-tissue disorder	M32, M33.2, M34, M05.3, M05.8	289	6	0	0	309	25	6	0	1120	68	55	10	478	28	60	0	2576	185	174	49	311	0	0	0	1360	48	70	8	54	0	0	0	134	0	0	0	245	5	32	0	894	31	12	0	262	0	10	0
Peptic ulcer	K25 - K28	694	36	48	0	2116	196	99	26	2536	294	97	34	2075	102	183	3	2125	399	274	85	173	21	0	0	1116	133	89	72	57	0	0	0	85	5	5	0	231	35	20	0	1089	147	58	10	300	26	10	21
Mild liver disease	K70.2 - .3, K73, K71.7, K74.0, K74.2 - 5	754	78	59	25	292	28	13	0	1062	139	66	32	399	37	36	5	996	165	96	31	43	5	0	0	481	48	27	18	19	0	0	0	28	0	0	0	67	5	0	0	371	47	18	5	108	7	0	0
Diabetes	E10.9, E11.9, E13.9, E14.9, E10.1, E11.1, E13.1, E14.1, E10.5, E11.5, E13.5, E14.5	7558	337	342	107	8944	713	506	186	29153	1705	1264	403	24098	847	2380	287	40161	3845	3464	1018	5218	250	241	87	19959	977	1054	310	1367	81	86	28	4931	245	252	72	3194	238	320	97	24161	1196	945	279	7145	386	402	294
Diabetes complications	E10.2, E11.2, E13.2, E14.2, E10.3, E11.3, E13.3, E14.3, E10.4, E11.4, E13.4, E14.4	474	36	12	0	858	81	65	13	3058	288	141	64	1588	69	185	14	3619	446	307	113	351	19	10	0	1807	117	115	30	104	0	6	0	401	26	11	0	295	33	20	7	2677	184	113	32	835	62	37	45
Paraplegia	G81, G04.1, G82.0 - 2	709	82	76	32	607	119	70	26	2840	387	288	102	1107	174	198	45	6694	1285	1331	407	880	156	204	77	2949	337	397	91	185	6	19	0	427	35	28	5	286	36	48	8	3353	426	426	97	945	101	136	69
Renal disease	N03, N05.2 - 6, N07.2 - 4, N01, N18, N19, N25	3970	323	258	93	5316	655	437	178	20856	2000	1278	462	6676	375	932	128	24613	3214	2599	907	2608	251	175	67	14484	1316	1188	400	1540	128	171	46	2393	215	213	72	3077	369	412	144	20373	1739	1085	373	8129	702	617	545
Haematological neoplasms	C80 - C86, C88.3, C88.7, C88.9, C90.0, C90.1, C91 - C94.3, C94.51, C94.7, C95 - 96	325	5	0	0	309	0	0	0	1056	69	22	0	231	5	13	0	1339	112	94	27	331	12	0	0	1194	63	44	46	0	0	0	0	79	0	0	0	127	6	6	0	1596	96	50	11	424	6	0	6
Severe liver disease	K72.9, K66.6, K66.7, K72.1	114	22	0	0	226	90	53	38	863	358	199	145	741	43	187	7	393	204	112	66	51	9	0	0	566	292	181	115	0	0	0	0	19	10	0	0	53	22	11	0	208	73	49	30	65	24	0	18
HIV	B20 - 24	51	0	0	0	0	0	0	0	32	0	0	0	34	0	0	0	152	13	12	0	0	0	0	0	0	0	0	0	27	0	0	0	0	0	0	0	0	0	0	0	23	0	0	0	0	0	0	0
		114	22	0	0	226	90	53	38	863	358	199	145	741	43	187	7	393	204	112	66	51	9	0	0	566	292	181	115	0	0	0	0	19	10	0	0	53	22	11	0	208	73	49	30	65	24	0	18
[truncated: 8 more columns]
