# Supplementary material
Source: Research Square preprint supplement (doi:10.21203/rs.3.rs-8610908/v1)
Supplement: Supplementary file 6 [file fb4ba3b43b71994a061c383a.xlsx]

## Sheet: SPC - overall
all hospital cases
location of solid tumors		location of solid tumors	oral cavity & throat		stomach		intestine / rectum		pancreas		lung		malignant melanoma		breast		cervix		uterus without cervix		ovary		prostate		kidney		urinary bladder		total
ICD-10 code		ICD-10 code	C00 - 14		C16		C18 - 20		C25		C34		C43		C50		C53		C54 - 55		C56		C61		C64		C67
total number of patients			64973		55714		181464		77490		254444		44705		207681		18215		27961		35523		158001		37420		129135		1292726
recevied no PC			62187	0.957121	51914	0.931795	172640	0.951373	69659	0.898942	234599	0.922006	43077	0.963583	198374	0.955186	17097	0.938622	26560	0.949894	32291	0.909017	152343	0.96419	35351	0.944709	126252	0.977675	1222344	0.945555
number cases receiving SPC			2786	0.0428793	3800	0.0682055	8824	0.0486267	7831	0.101058	19845	0.0779936	1628	0.0364165	9307	0.0448139	1118	0.061378	1401	0.0501055	3232	0.0909833	5658	0.0358099	2069	0.0552913	2883	0.0223255	70382	0.0544446
palliative care codes	total	OPS code	2896		3920		9060		8047		20509		1708		9582		1170		508		3348		5806		2145		2999		71698
	complex palliative care (e.g. on an external ward)	8-982	698	0.250538	1230	0.323684	2965	0.336015	2493	0.31835	6567	0.330915	421	0.2586	2959	0.317933	289	0.258497	124	0.0885082	938	0.290223	1768	0.312478	665	0.321411	800	0.277489	21917	0.311401
	specialized pallative care on a palliative care ward	8-98e	1269	0.455492	1841	0.484474	4381	0.496487	3981	0.508364	9602	0.48385	751	0.461302	4571	0.491136	516	0.461538	292	0.208423	1544	0.477723	2942	0.519972	1047	0.506042	1482	0.514048	34219	0.48619
	specialized pallative care by a consultation service	8-98h	929	0.320787	849	0.216582	1714	0.189183	1573	0.195477	4340	0.211614	536	0.313817	2052	0.214152	365	0.311966	92	0.181102	866	0.258662	1096	0.18877	433	0.201865	717	0.23908	15562	0.217049
fatal hospital cases
		all hospital cases
location of solid tumors		location of solid tumors	oral cavity & throat		stomach		intestine / rectum		pancreas		lung		malignant melanoma		breast		cervix		uterus without cervix		ovary		prostate		kidney		urinary bladder		total
ICD-10 code		ICD-10 code	C00 - 14		C16		C18 - 20		C25		C34		C43		C50		C53		C54 - 55		C56		C61		C64		C67
total number of patients			3045		4304		10595		8264		23715		1591		8134		727		1261		2243		6894		2139		4113		77025
recevied no PC			2145	0.704433	2649	0.615474	7627	0.719868	5258	0.636254	16650	0.702087	978	0.614708	5217	0.641382	432	0.594223	789	0.625694	1290	0.575123	5039	0.730925	1443	0.674614	2942	0.715293	52459	0.681065
number cases receiving SPC			900	0.295567	1655	0.384526	2968	0.280132	3006	0.363746	7065	0.297913	613	0.385292	2917	0.358618	295	0.405777	472	0.374306	953	0.424877	1855	0.269075	696	0.325386	1171	0.284707	24566	0.318935
palliative care codes	total	OPS code	1102				3093		3119		8079		649		3080		290		508		1008		1933		577		1235		24673
	complex palliative care (e.g. on an external ward)	8-982	536	0.595556	395	0.238671	856	0.28841	833	0.277112	2101	0.297381	156	0.254486	777	0.26637	69	0.233898	124	0.262712	241	0.252886	451	0.243127	80	0.114943	267	0.22801	6886	0.280306
	specialized pallative care on a palliative care ward	8-98e	333	0.37	883	0.533535	1856	0.625337	1853	0.616434	4782	0.676858	371	0.60522	1830	0.627357	189	0.640678	292	0.618644	603	0.632739	1221	0.658221	447	0.642241	757	0.646456	15417	0.627575
	specialized pallative care by a consultation service	8-98h	233	0.211434	210	#DIV/0!	381	0.123181	433	0.138827	1196	0.148038	122	0.187982	473	0.153571	32	0.110345	92	0.181102	164	0.162698	261	0.135023	50	0.0866551	211	0.17085	3858	0.156365
Fallzahl
no PC
8-982
8-98e
8-08h
all
			C00 - 14		C16		C18 - 20		C25		C34		C43		C50				C54 - 55		C56		C61		C64		C67
			64973		55714		181464		77490		254444		44705		207681				27961		35523		158001		37420		129135
			62077		51794		172404		69443		233938		42997		198099				26514		32175		152195		35275		126136
			698		1230		2965		2493		6567		421		2959				124		938		1768		665		800
			1269		1841		4381		3981		9602		751		4571				292		1544		2942		1047		1482
			929		849		1714		1573		4340		536		2052				92		866		1096		433		717
			2896		3920		9060		8047		20509		1708		9582				508		3348		5806		2145		2999
