# Supplementary material
Source: Research Square preprint supplement (doi:10.21203/rs.3.rs-8610908/v1)
Supplement: Supplementary file 7 [file fe9a61ee2a8b8a2bd5d0d7bc.xlsx]

## Sheet: mortality
		all hospital cases			specialized palliative care
Malignant tumour of	defining ICD-10-GM code	all hospital cases	fatal cases	in-hospital mortality	all hospital cases	fatal cases	in-hospital mortality
oral cavity / throat	C00 - 14	64973	3045	0.0468656	2786	900	0.323044
stomach	C16	55714	4304	0.0772517	3800	1655	0.435526
intenstine/rectum	C18 - 20	181464	10595	0.0583862	8824	2968	0.336355
pancreas	C25	77490	8264	0.106646	7831	3006	0.383859
lung	C34	254444	23715	0.0932032	19845	7065	0.356009
malignant melanoma	C43	44705	1591	0.0355889	1628	613	0.376536
breast	C50	207681	8134	0.0391658	9307	2917	0.31342
cervix	C53	18215	727	0.0399122	1118	295	0.263864
uterus (without cervix)	C54 - 55	27961	1261	0.0450985	1401	472	0.336902
ovary	C56	35523	2243	0.0631422	3232	953	0.294864
prostate	C61	158001	6894	0.0436326	5658	1855	0.327854
kidney	C64	37420	2139	0.0571619	2069	696	0.336394
bladder	C67	129135	4113	0.0318504	2883	1171	0.406174
location of secondary malignancies		lung			pleura			(retro-) peritoneal			liver			brain / lepto-meningeal			bone / bone marrow			adrenal gland
defining ICD-10-GM code		C78.0			C78.2			C78.6			C78.7			C79.3			C79.5			C79.7
		all hospital cases	fatal cases	in-hospital mortality	all hospital cases	fatal cases	in-hospital mortality	all hospital cases	fatal cases	in-hospital mortality	all hospital cases	fatal cases	in-hospital mortality	all hospital cases	fatal cases	in-hospital mortality	all hospital cases	fatal cases	in-hospital mortality	all hospital cases	fatal cases	in-hospital mortality
Malignant tumour of	defining ICD-10-GM code
oral cavity / throat	C00 - 14	3958	462	0.116726	588	104	0.176871	138	30	0.217391	1398	238	0.170243	579	98	0.169257	1955	317	0.162148	142	24	0.169014
stomach	C16	2456	367	0.14943	1204	285	0.236711	9760	1271	0.130225	8115	1025	0.126309	868	161	0.185484	2814	441	0.156716	615	85	0.138211
intenstine/rectum	C18 - 20	22970	2076	0.0903788	1587	263	0.165721	17995	2005	0.11142	47058	4134	0.087849	2883	353	0.122442	6628	825	0.124472	1375	158	0.114909
pancreas	C25	7633	312	0.0408751	1253	78	0.0622506	9988	503	0.0503604	26527	1042	0.0392807	406	41	0.100985	3019	160	0.0529977	603	22	0.0364842
lung	C34	24668	2753	0.111602	21597	2981	0.138028	3160	680	0.21519	28762	4520	0.157152	40662	4994	0.122817	41098	5730	0.139423	16927	2032	0.120045
malignant melanoma	C43	3895	529	0.135815	448	103	0.229911	642	147	0.228972	2635	466	0.17685	4527	640	0.141374	2119	362	0.170835	575	97	0.168696
breast	C50	11356	1626	0.143184	8278	1130	0.136506	4215	738	0.175089	15733	2678	0.170215	8163	1169	0.143207	28956	3510	0.121218	733	94	0.12824
cervix	C53	1130	141	0.124779	206	39	0.18932	1110	158	0.142342	922	146	0.158351	238	46	0.193277	804	100	0.124378	49	0	0
uterus (without cervix)	C54 - 55	2429	299	0.123096	466	87	0.186695	2565	385	0.150097	1285	227	0.176654	465	74	0.15914	1185	165	0.139241	99	11	0.111111
ovary	C56	1456	226	0.15522	3020	346	0.11457	14522	1304	0.0897948	3231	457	0.141442	496	58	0.116935	646	112	0.173375	117	19	0.162393
prostate	C61	4628	593	0.128133	846	160	0.189125	1097	190	0.1732	5188	973	0.187548	1364	244	0.178886	33032	3322	0.100569	468	58	0.123932
kidney	C64	6174	768	0.124393	897	165	0.183946	831	157	0.188929	2326	386	0.16595	1602	221	0.137953	5313	654	0.123094	925	94	0.101622
bladder	C67	3890	560	0.143959	417	101	0.242206	1697	378	0.222746	3245	641	0.197535	670	136	0.202985	4858	725	0.149238	337	63	0.186944
